# Supplementary material for: Assessment of the Greenland ice sheet–atmosphere feedbacks for the next century with a regional atmospheric model coupled to an ice sheet model
Source: Copernicus journal article supplement (doi:10.5194/tc-13-373-2019), 2019-02-01
Supplement: Supplementary file 9 [file tc-13-373-2019-supplement.zip]

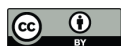

## *Supplement of*

# **Assessment of the Greenland ice sheet–atmosphere feedbacks for the next century with a regional atmospheric model coupled to an ice sheet model**

**Sébastien Le clec’h et al.**

*Correspondence to:* Sébastien Le clec’h (sebastien.le.clech@vub.be)

- tc-13-373-2019-supplement-title-page.pdf
- Supplement
  - FigS01.pdf
  - FigS02.pdf
  - FigS03.pdf
  - FigS04.pdf
  - FigS05.pdf
  - FigS06.pdf
  - FigS07.pdf
  - FigS08.pdf
  - FigS09.pdf
  - FigS10.pdf
  - FigS11.pdf
  - supplement\_TC\_2017\_230.tex

The copyright of individual parts of the supplement might differ from the CC BY 4.0 License.
