# Supplementary figures and images for: Assessment of the Greenland ice sheet–atmosphere feedbacks for the next century with a regional atmospheric model coupled to an ice sheet model
Source: Copernicus journal article supplement (doi:10.5194/tc-13-373-2019), 2019-02-01

# 2W Snowfall anomaly (2140—2150) - (2000—2010)

DJF mean

MAM mean

JJA mean

SON mean

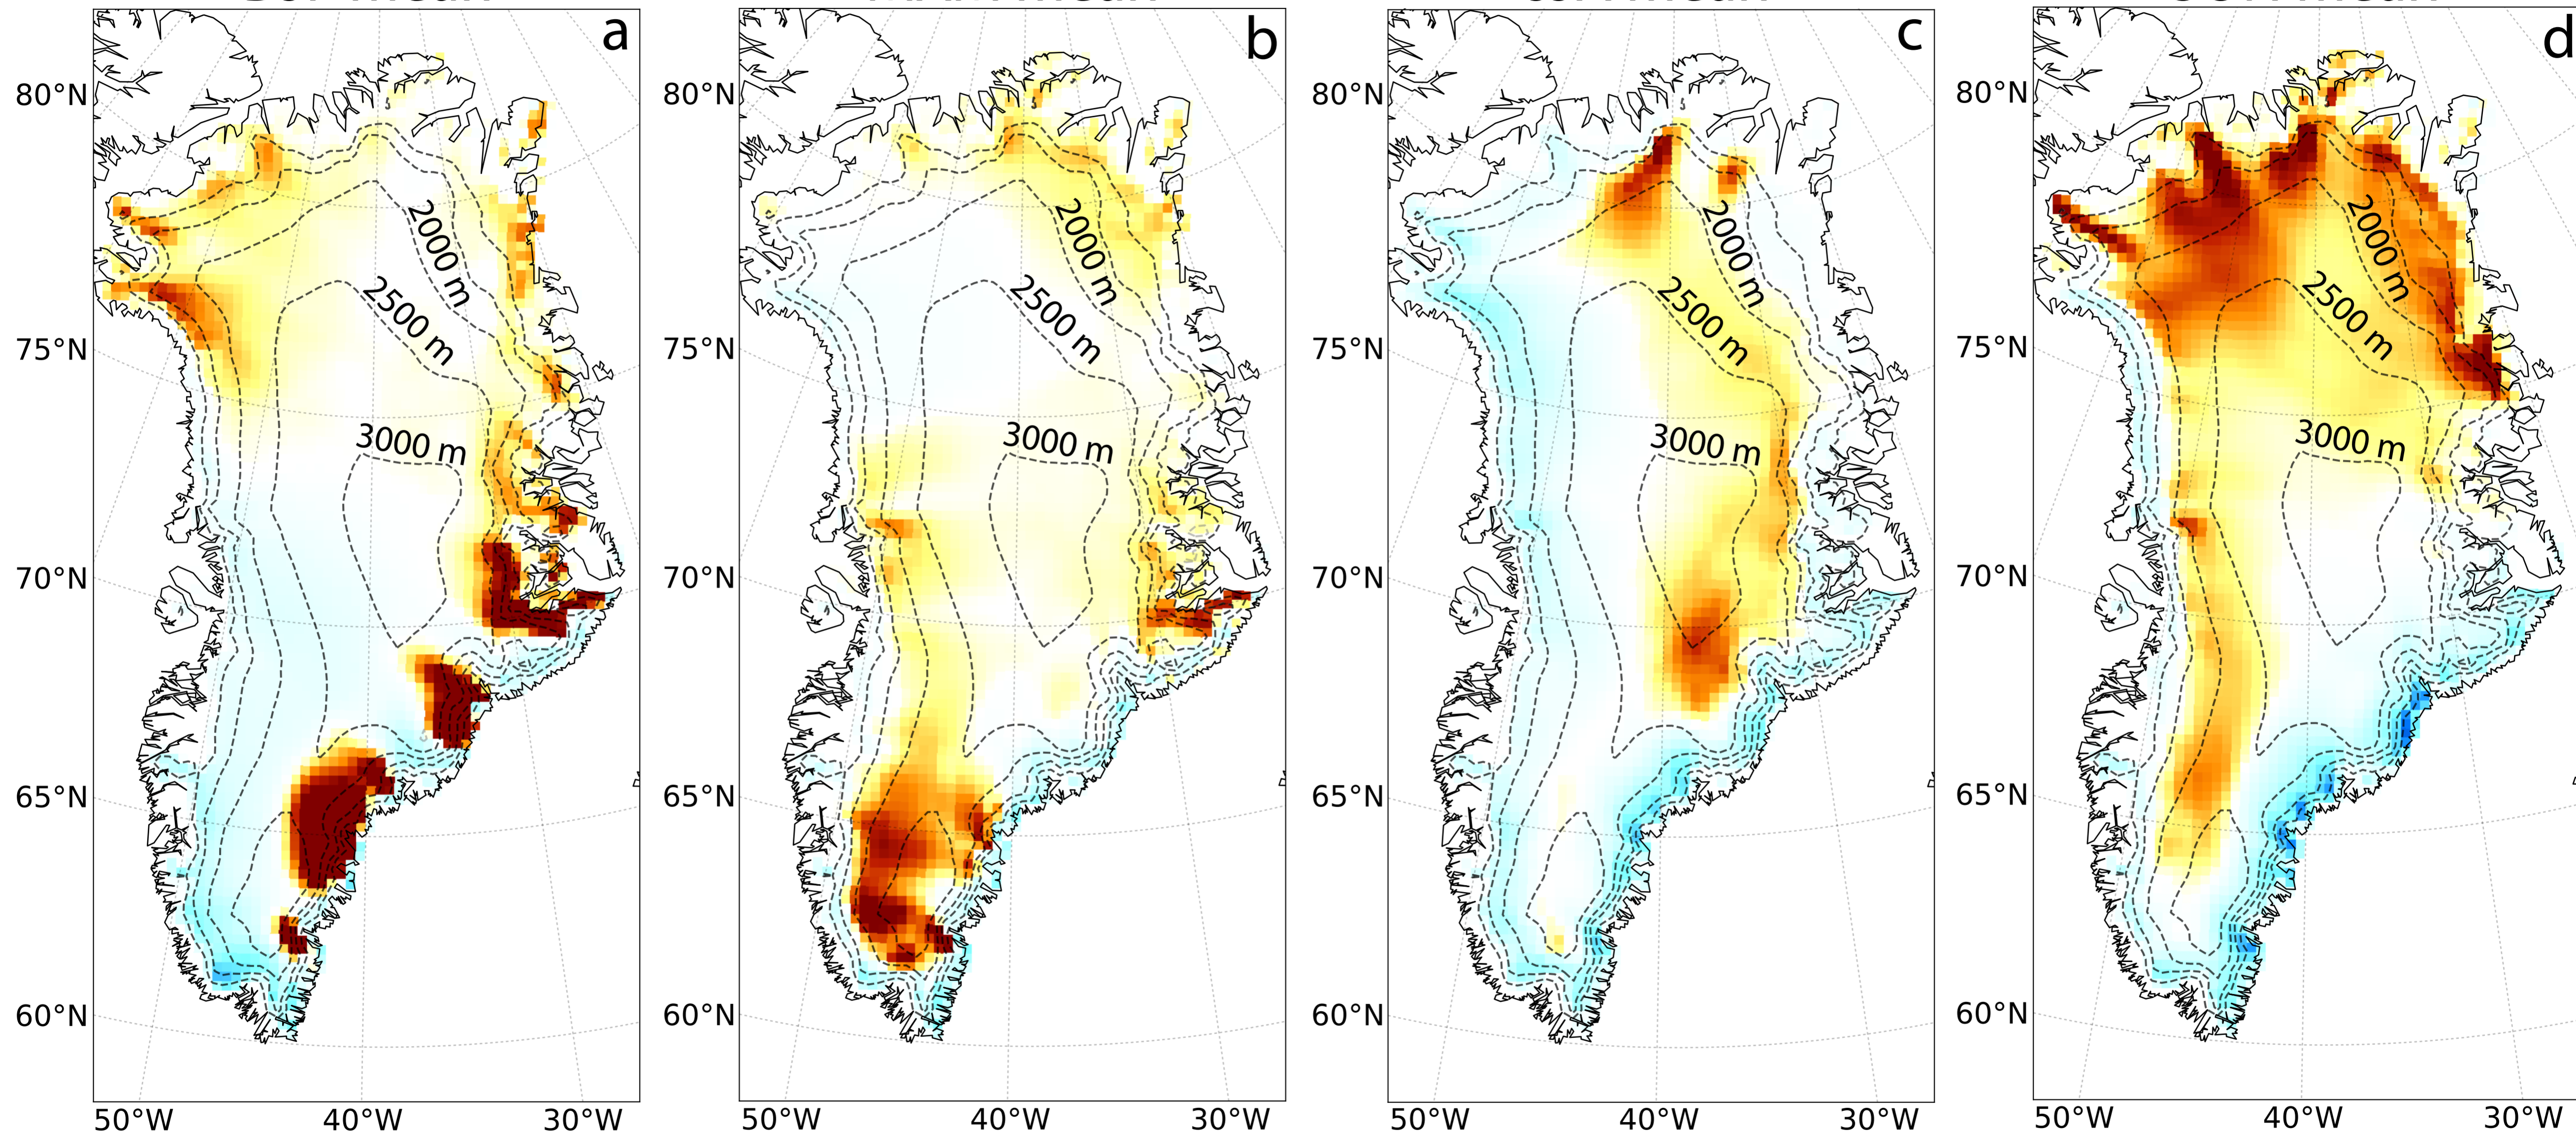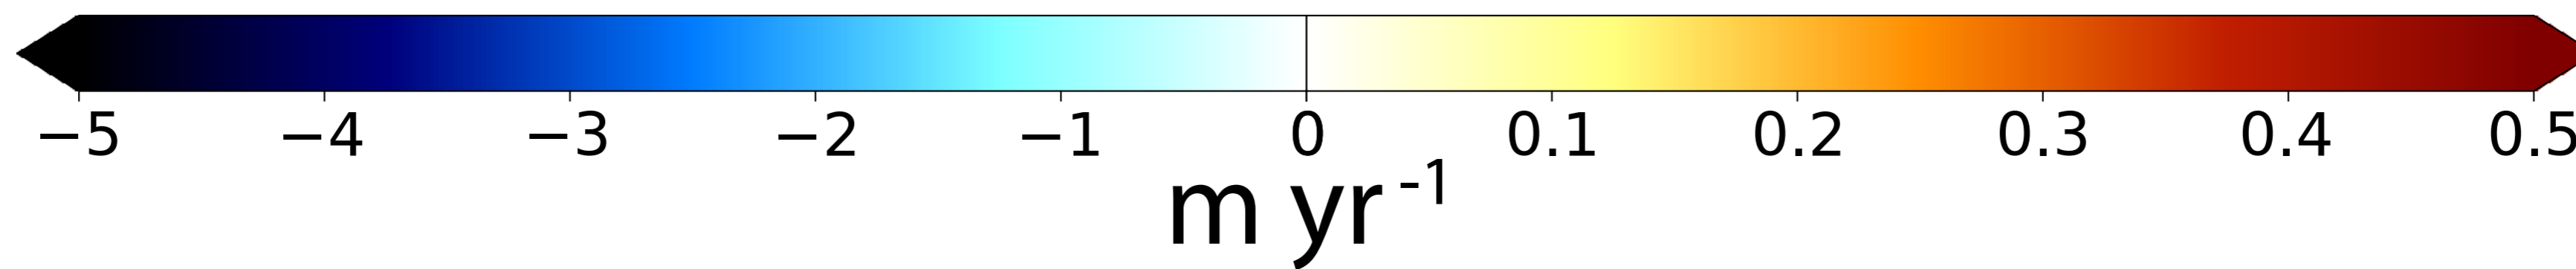

Supplement: Supplementary file 1 [file tc-13-373-2019-supplement.zip]

# 2W Runoff anomaly (2140—2150) - (2000—2010)

DJF mean

MAM mean

JJA mean

SON mean

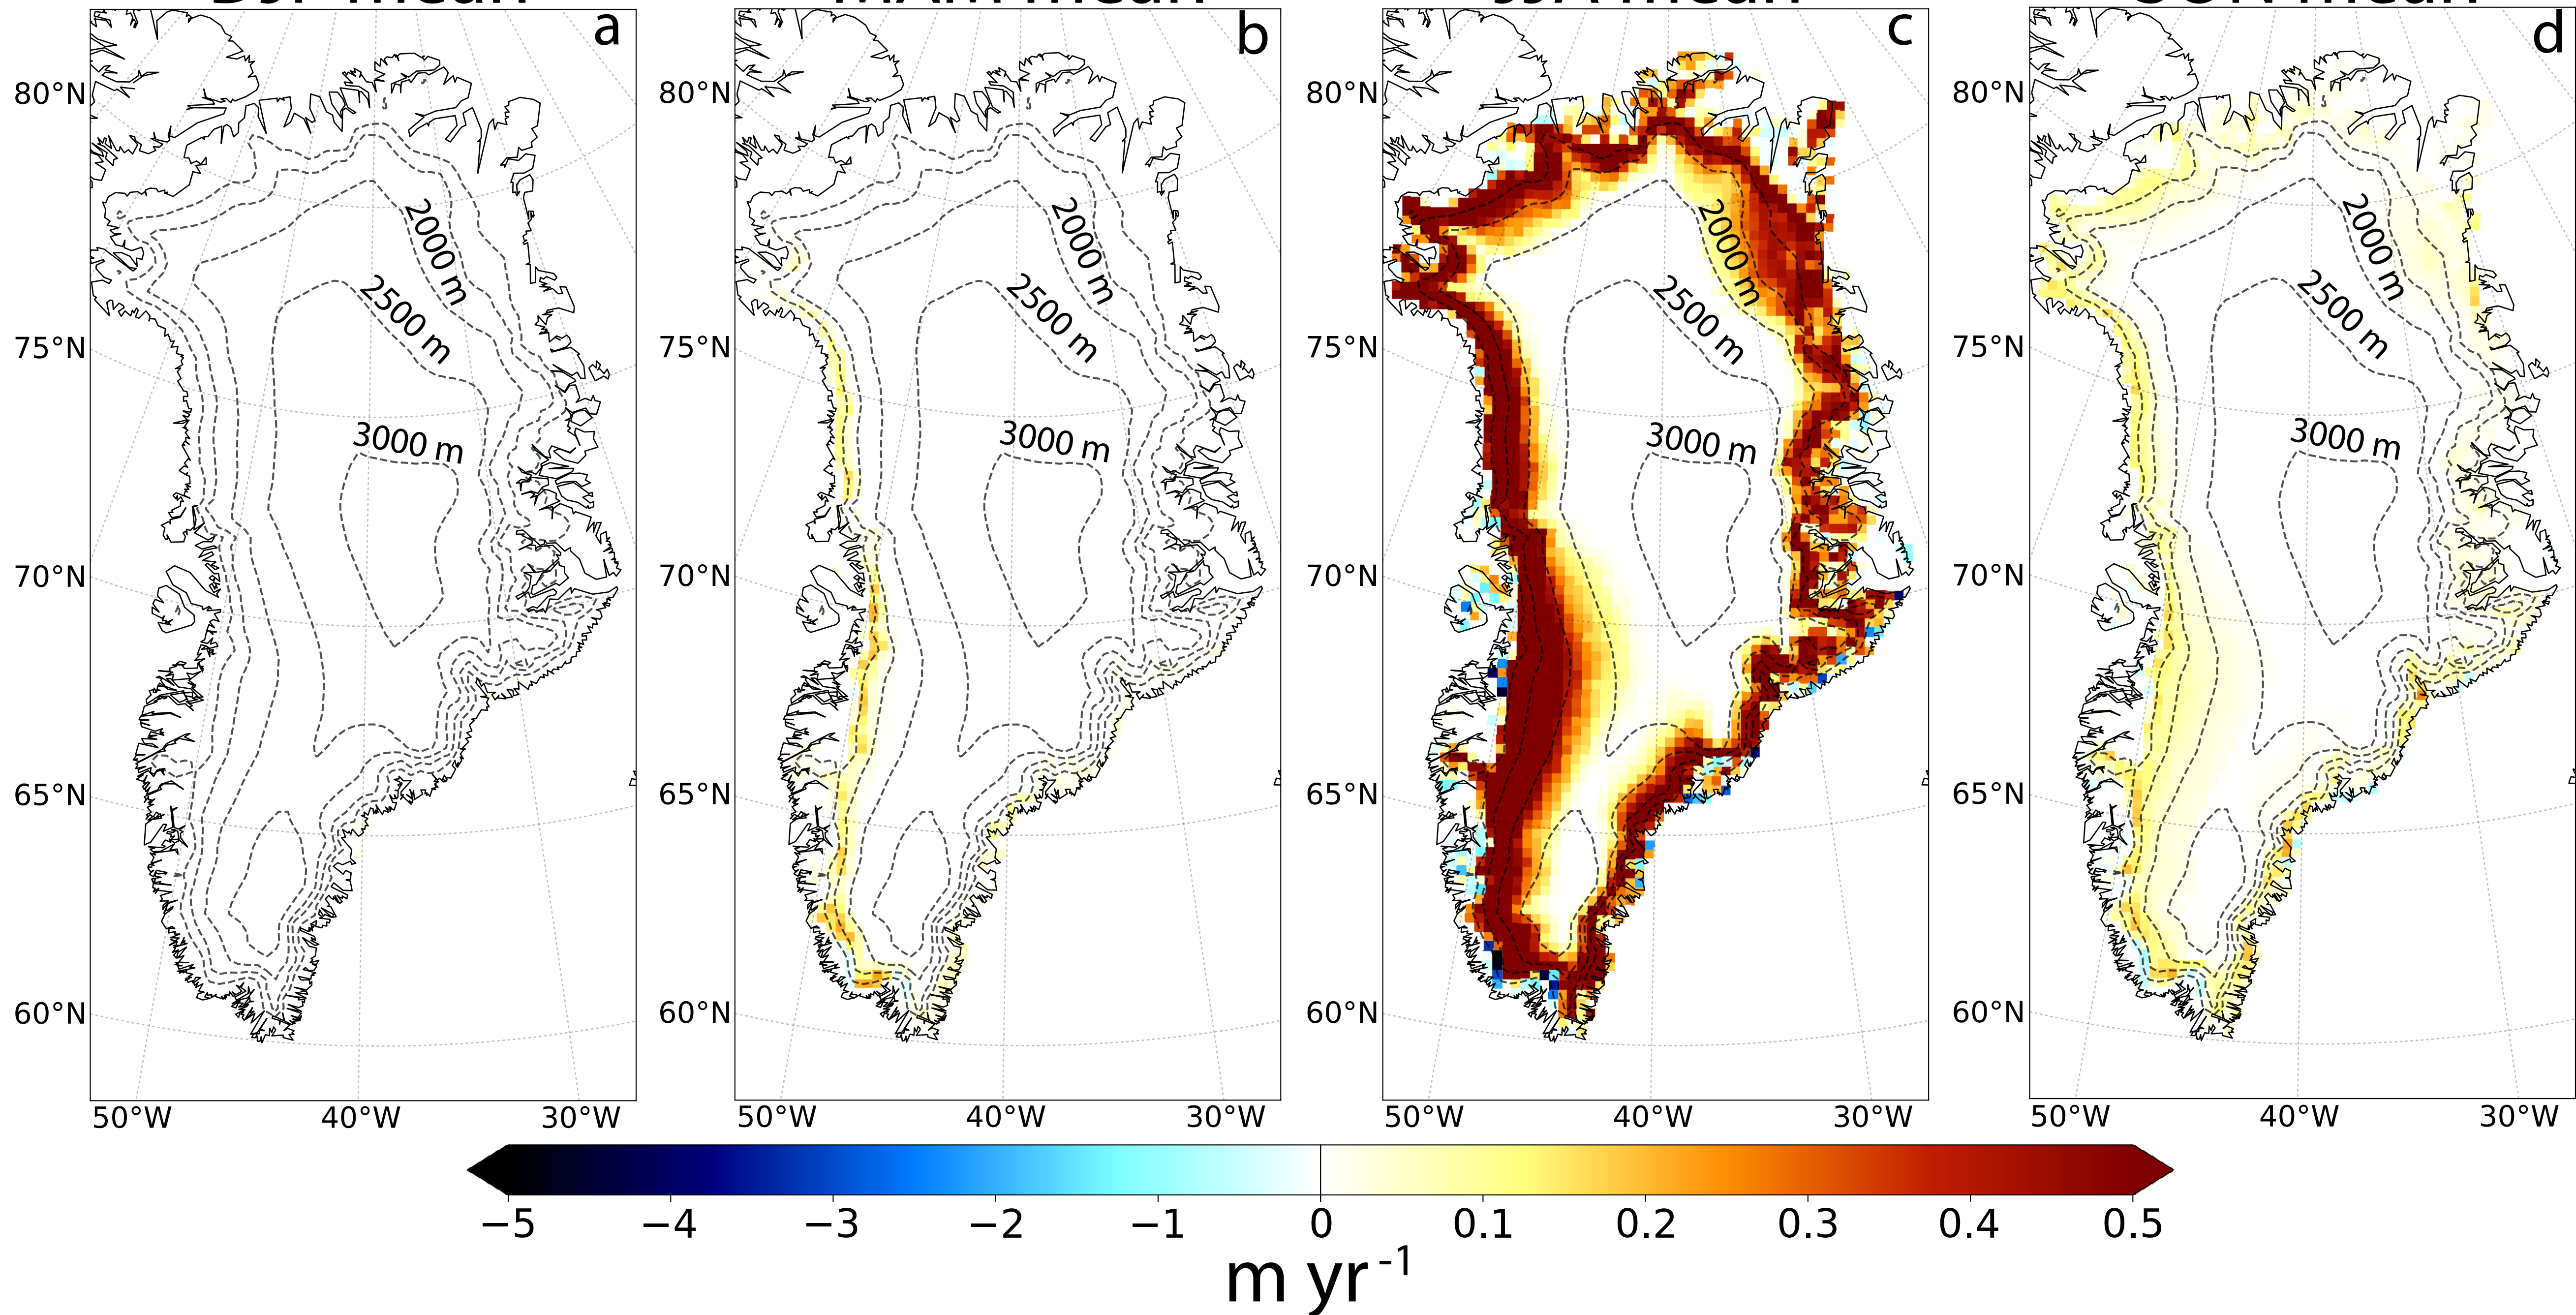

Supplement: Supplementary file 2 [file tc-13-373-2019-supplement.zip]

# Integrated (2000—2150) ice flux divergence NF - 2W

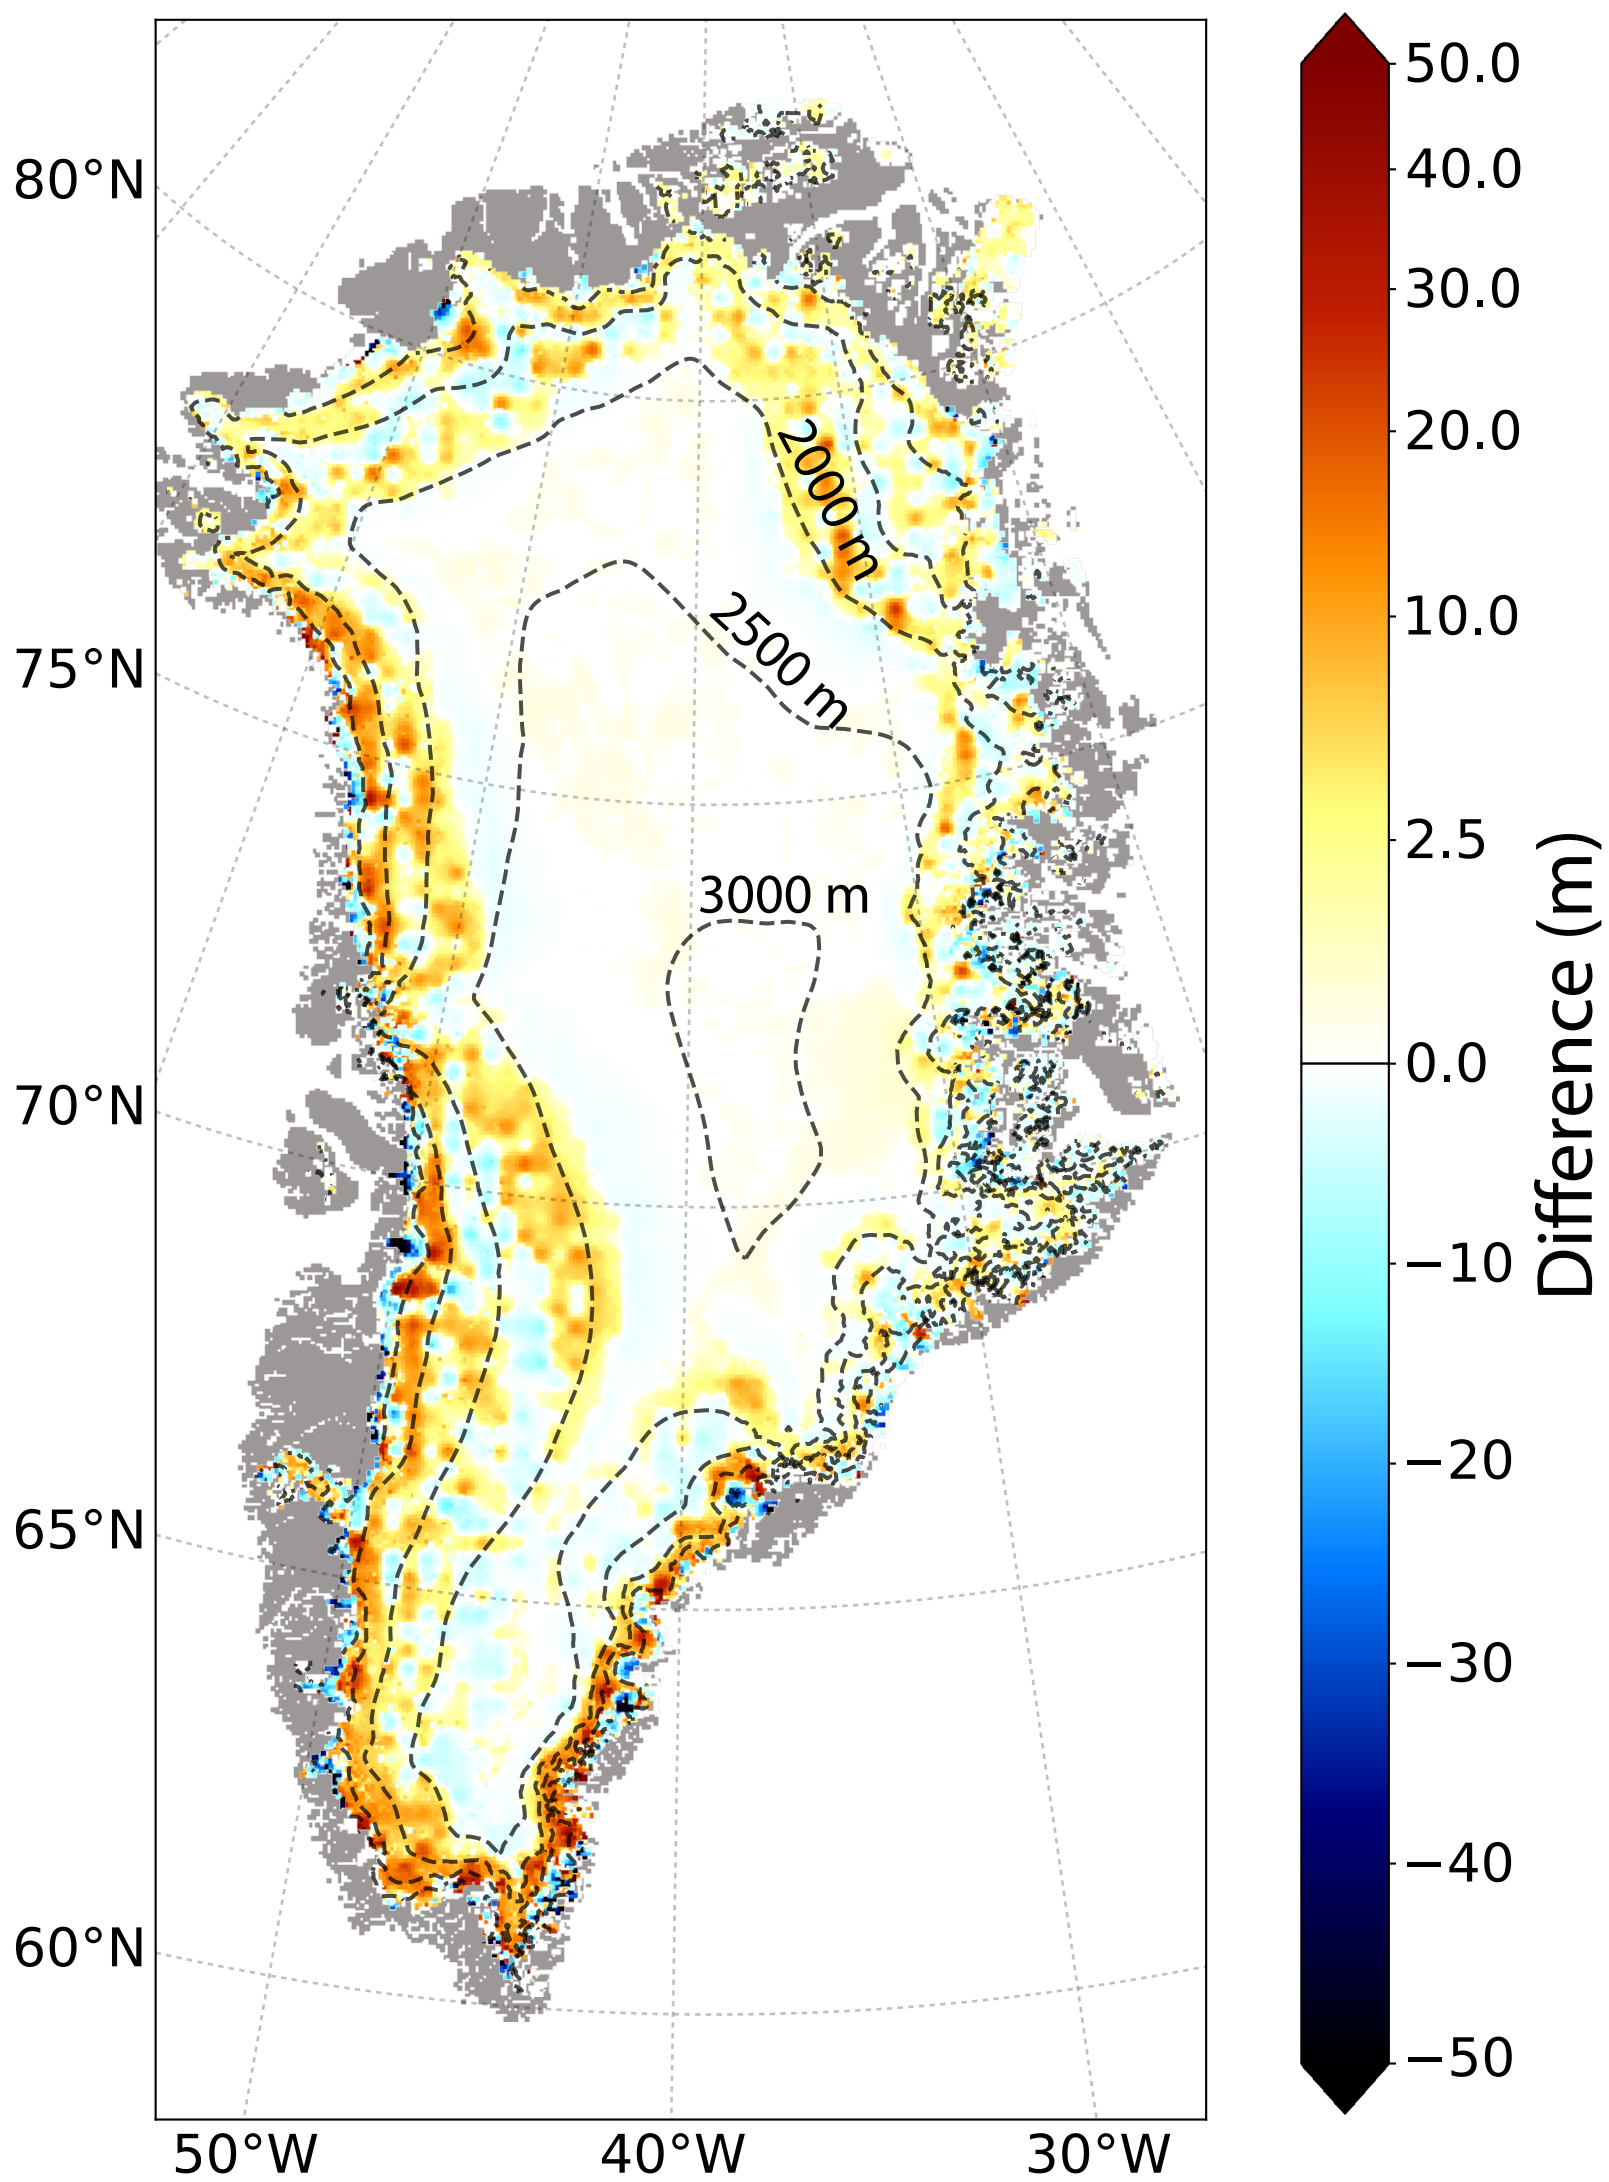

Supplement: Supplementary file 3 [file tc-13-373-2019-supplement.zip]

# NF - 2W snowfall difference 2150—2140

## Annual mean

## DJF mean

## MAM mean

## JJA mean

## SON mean

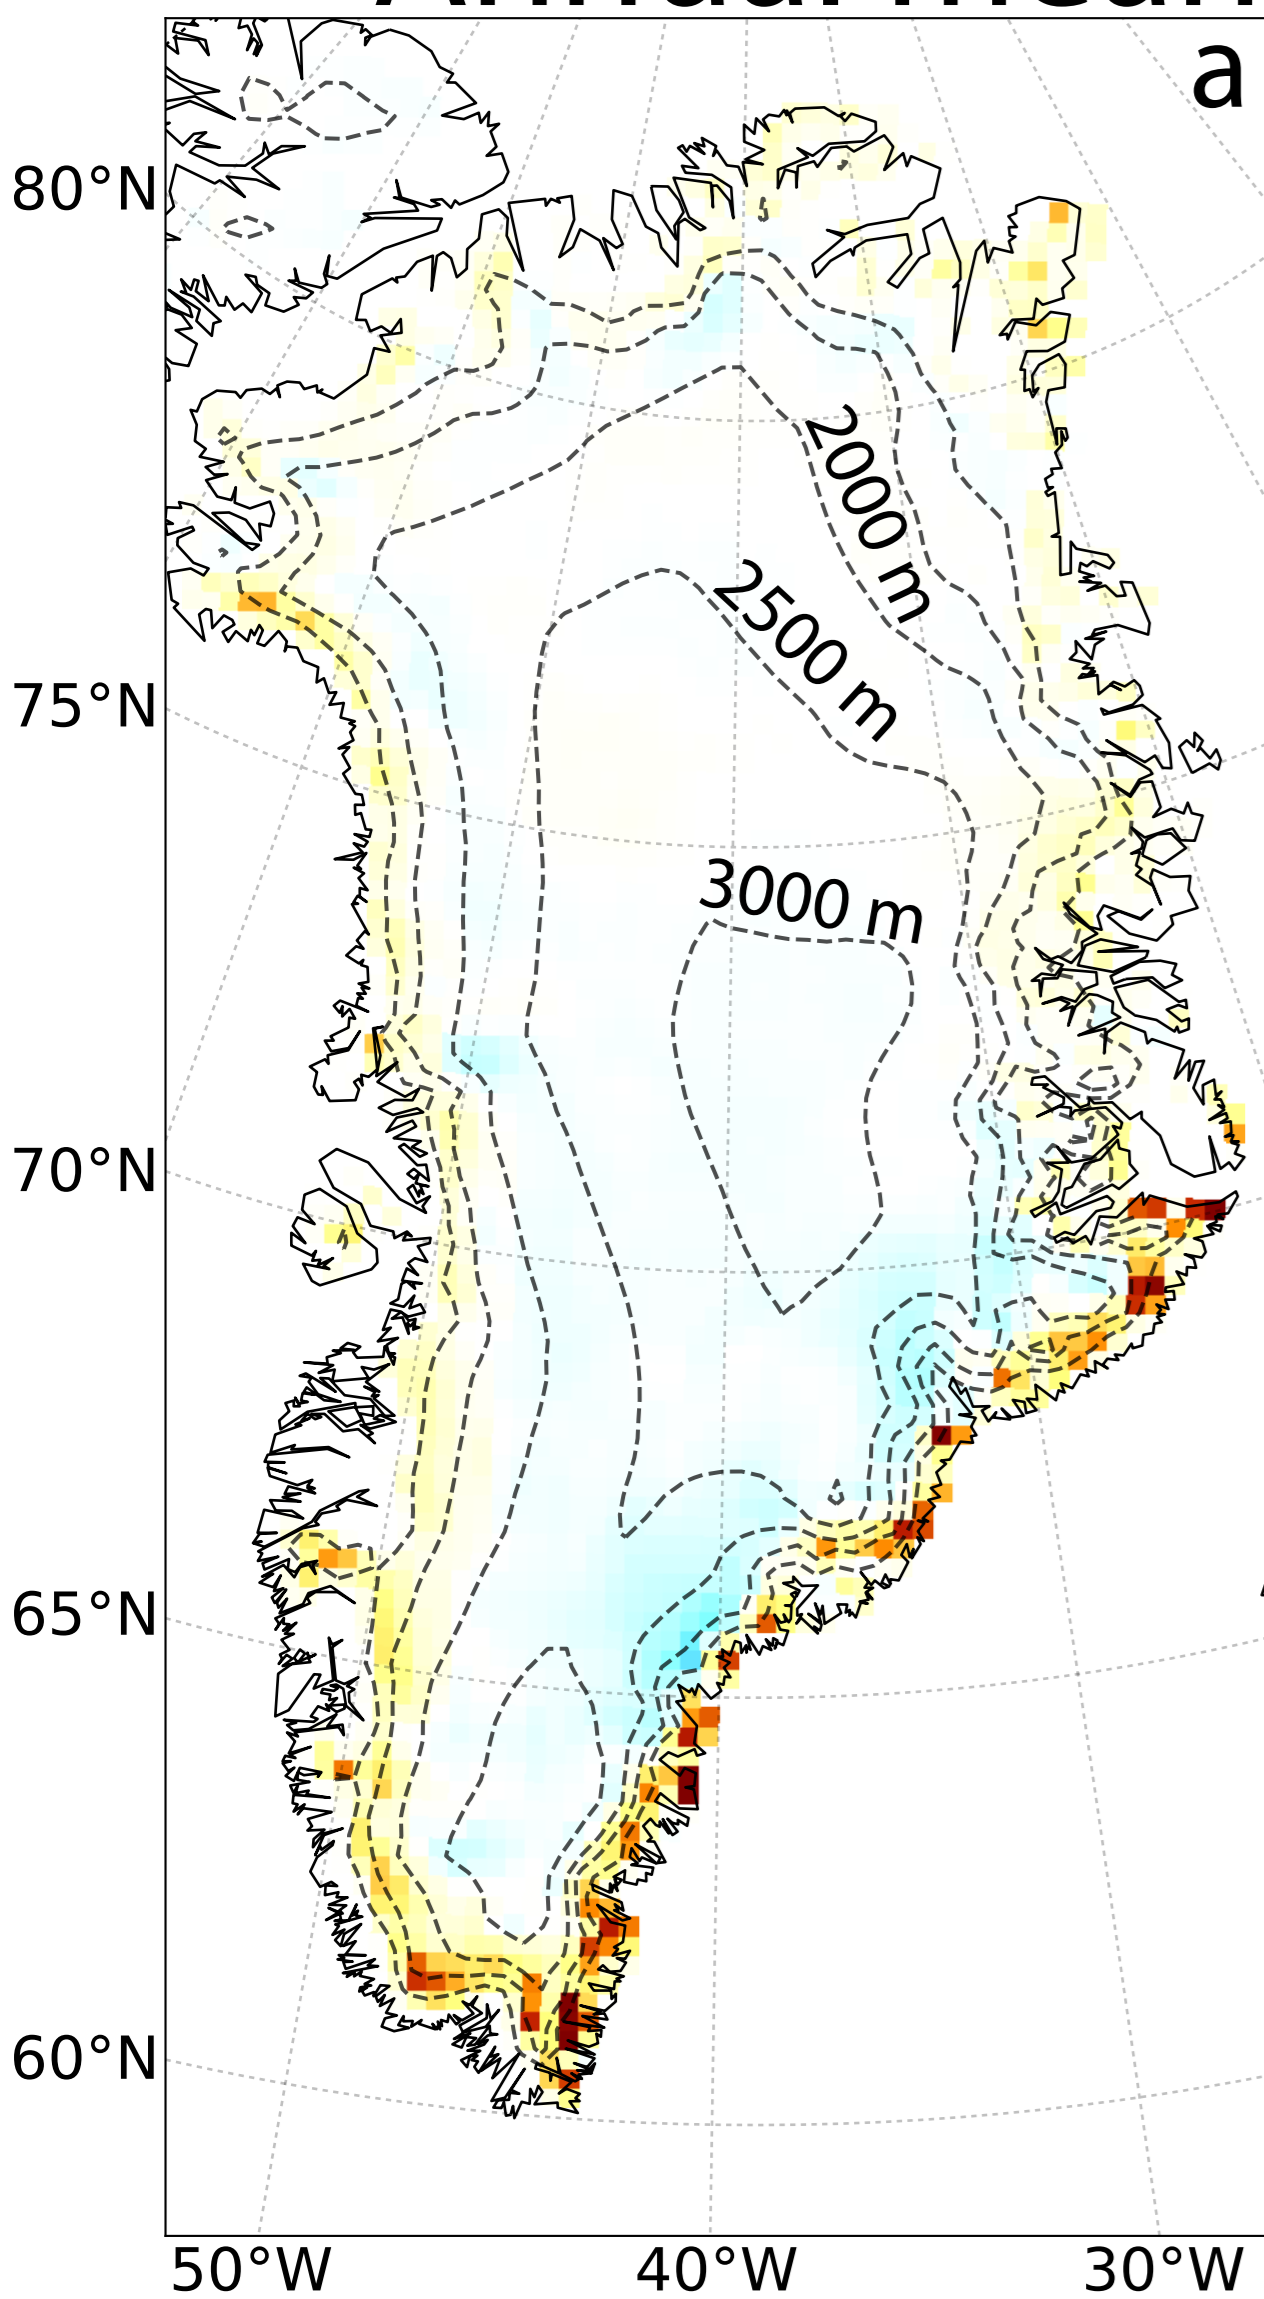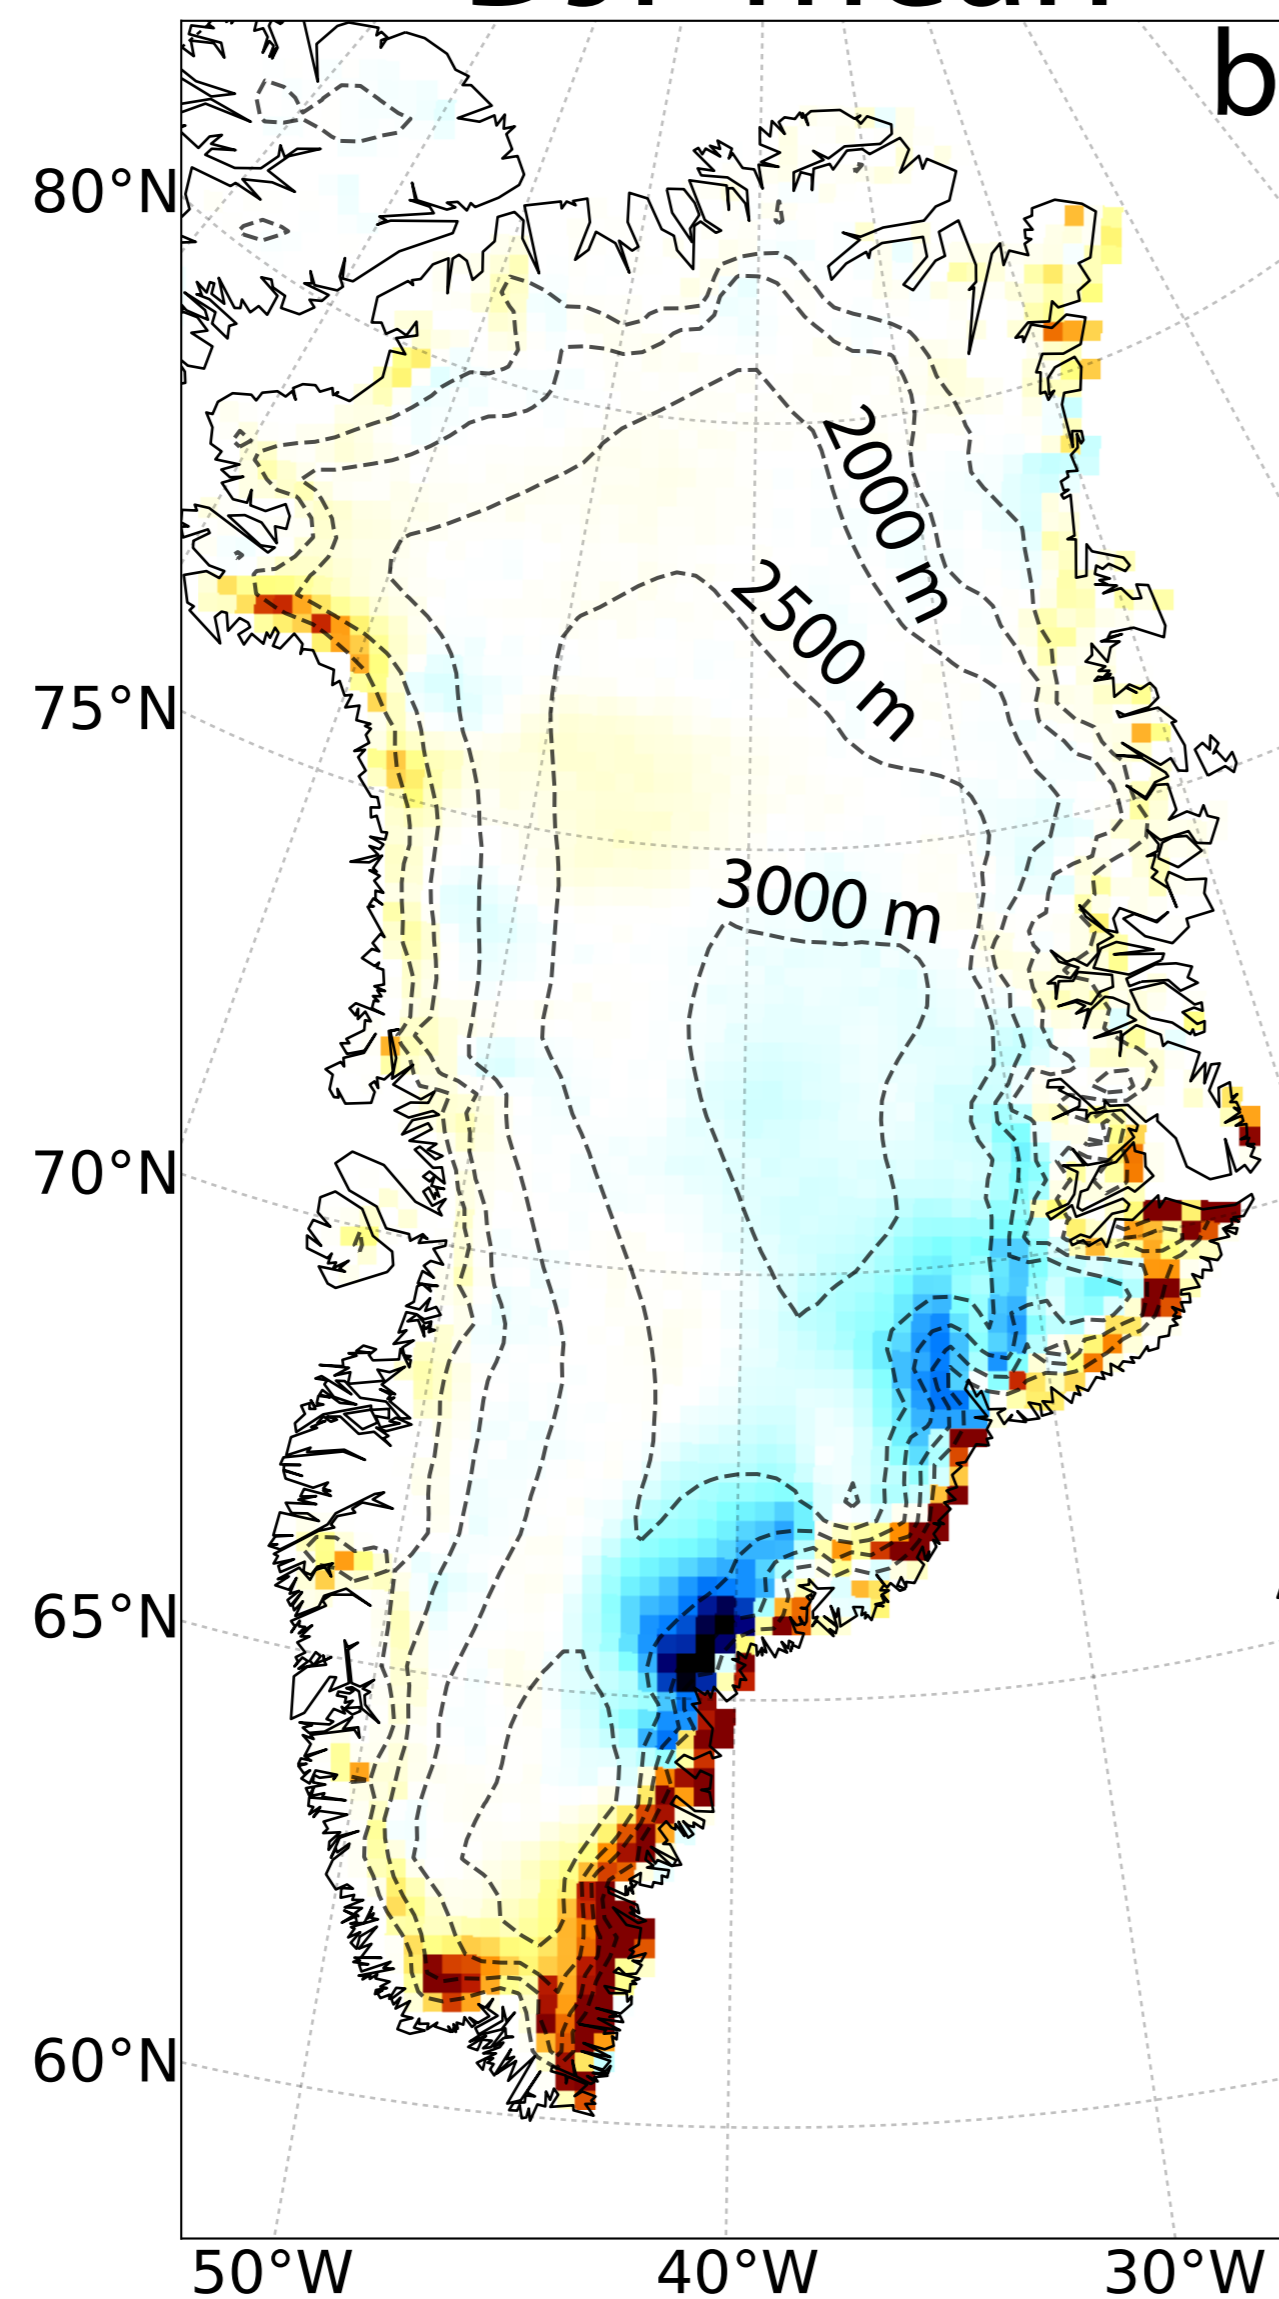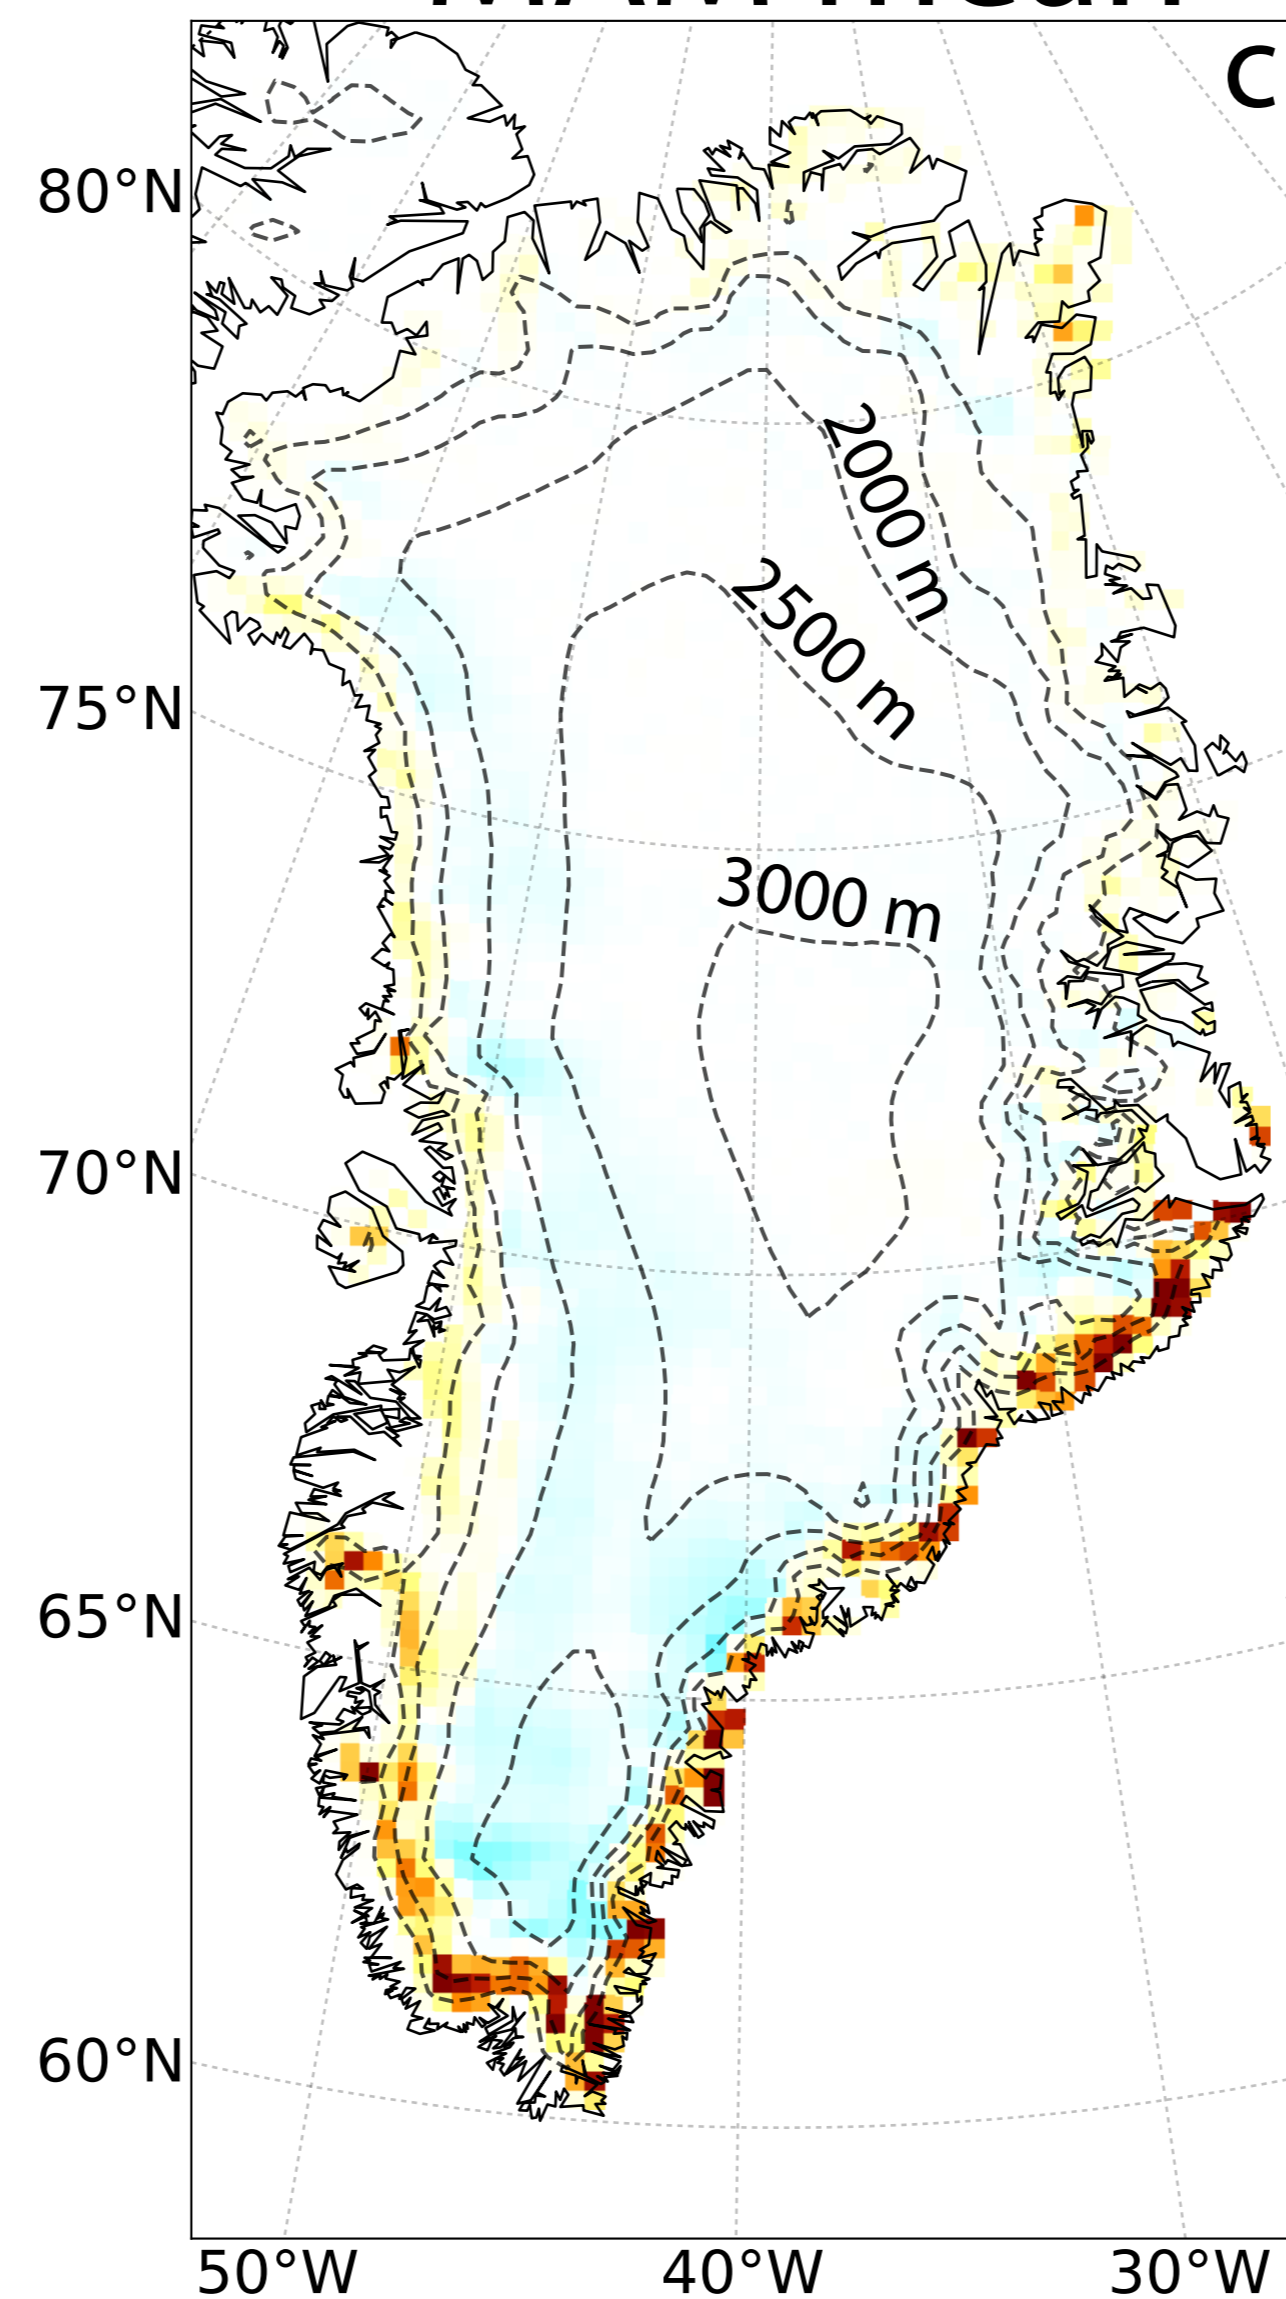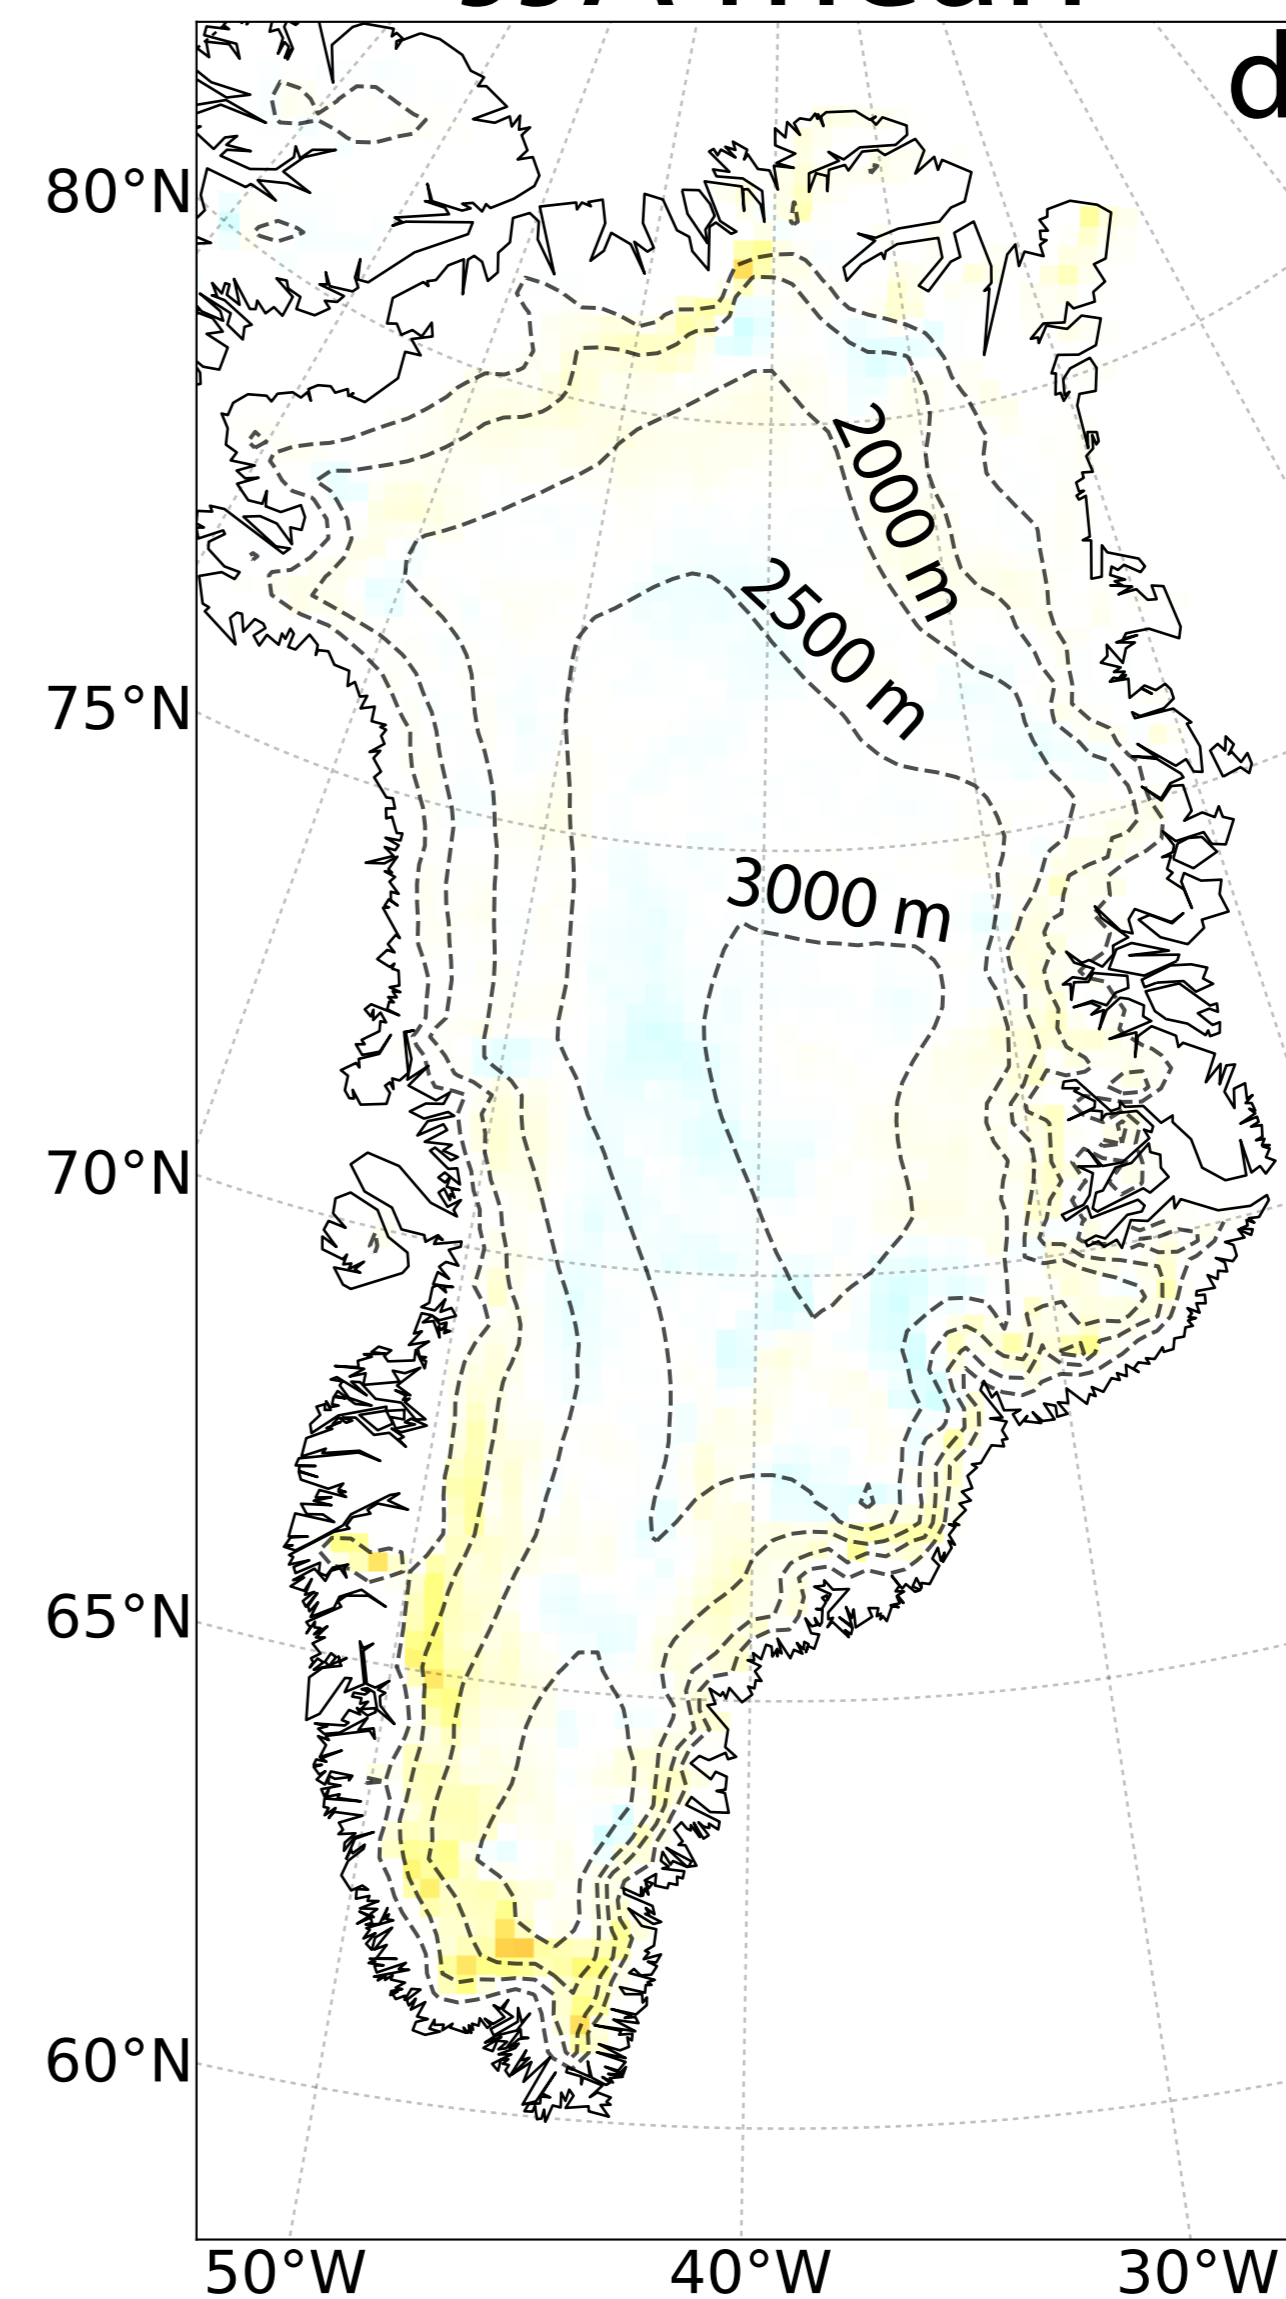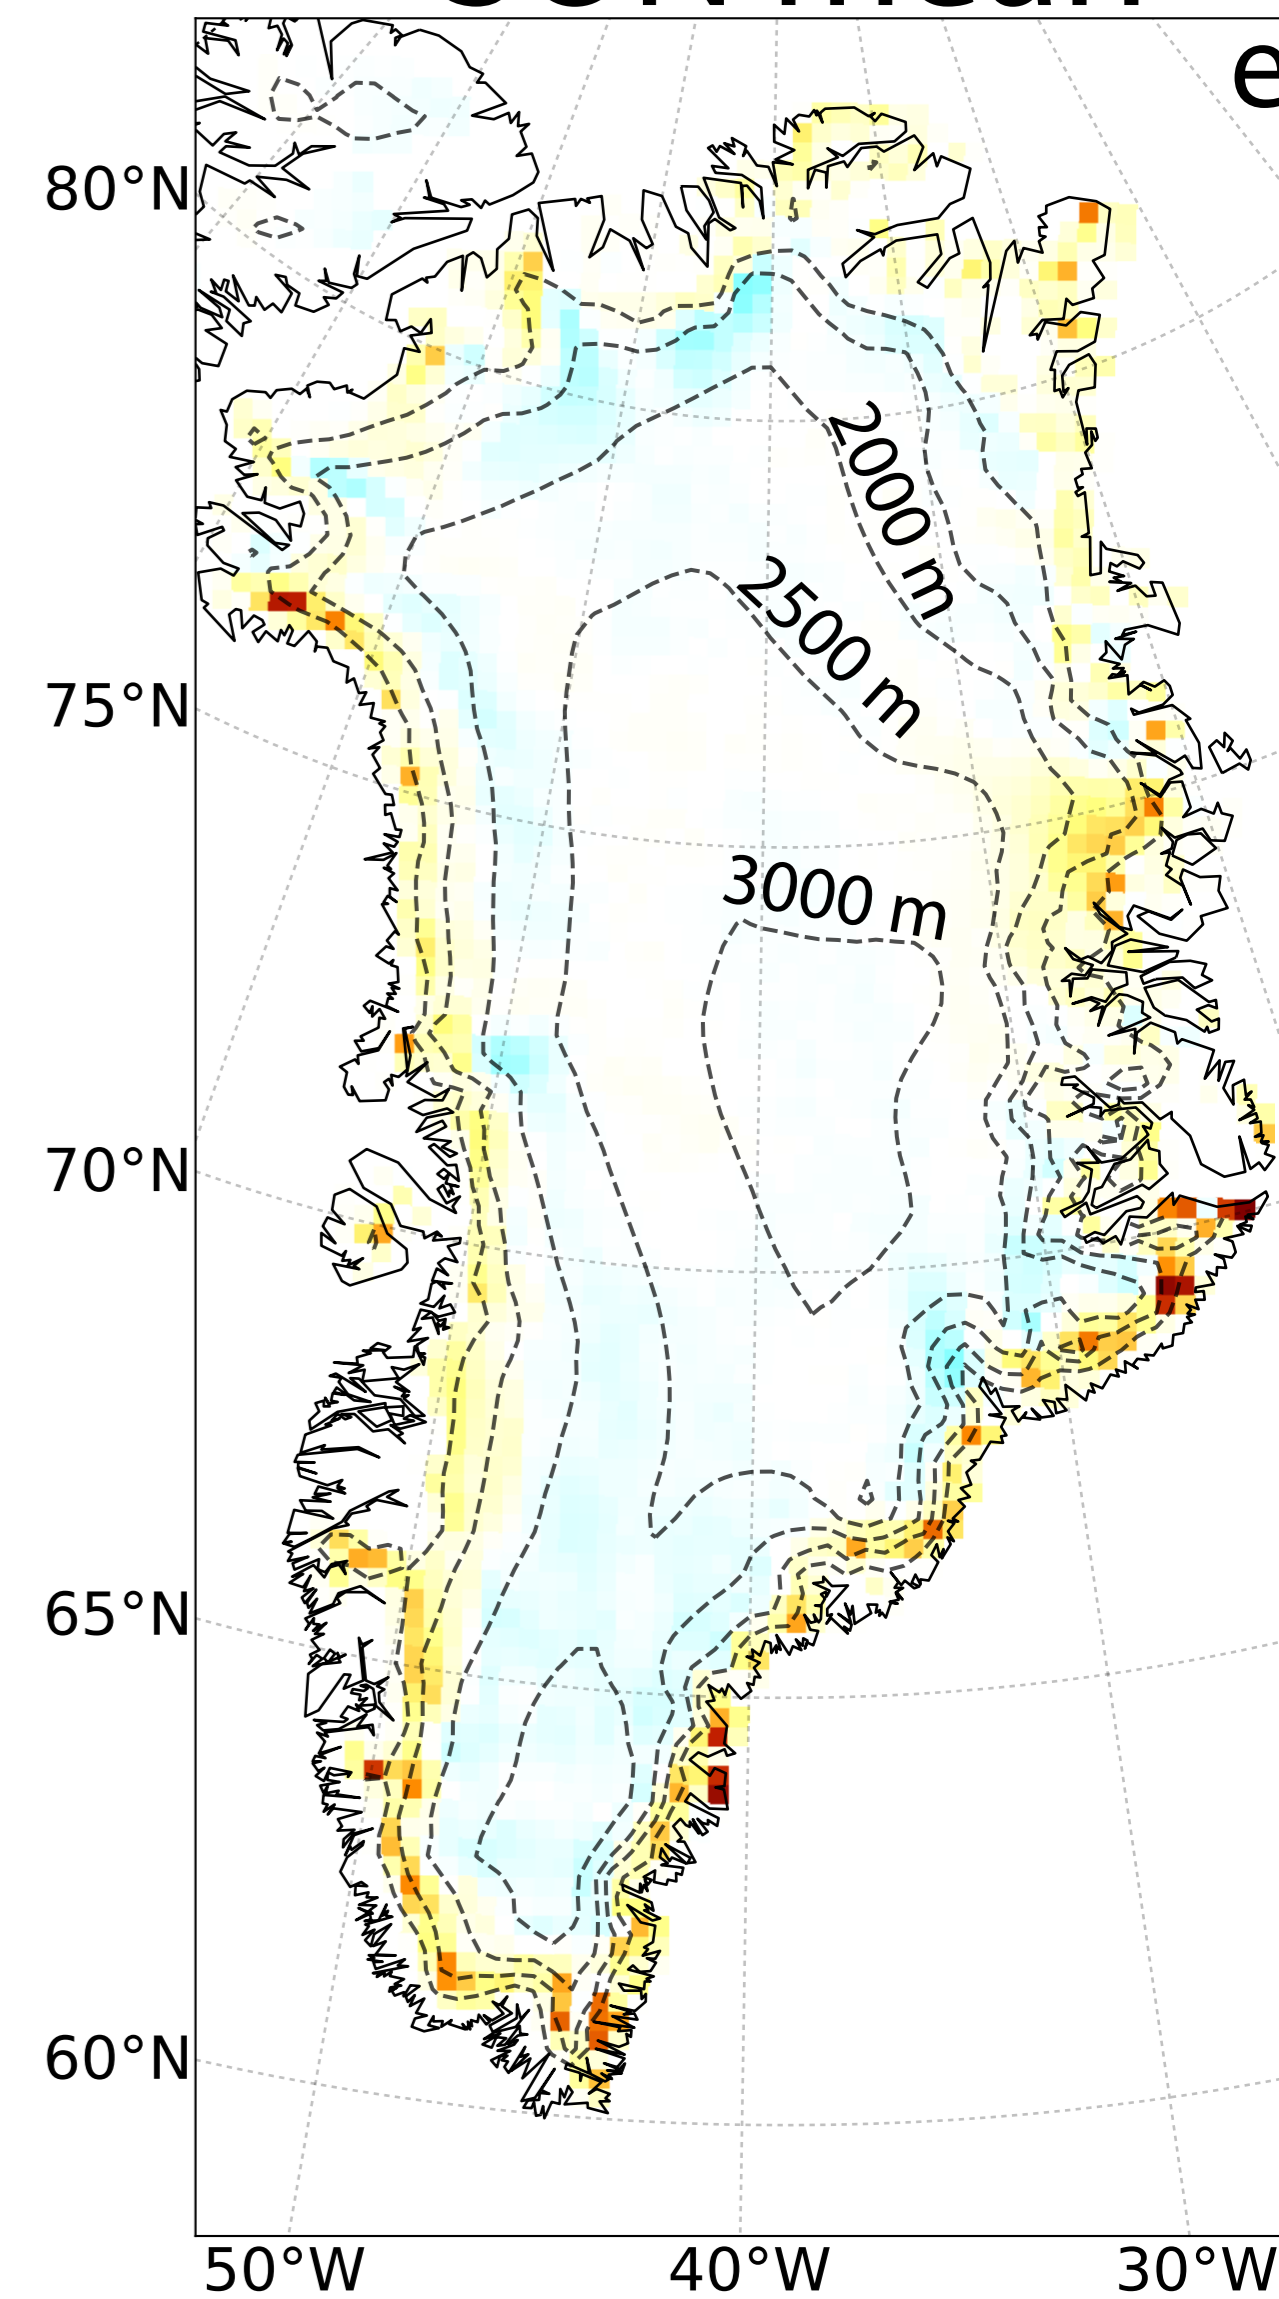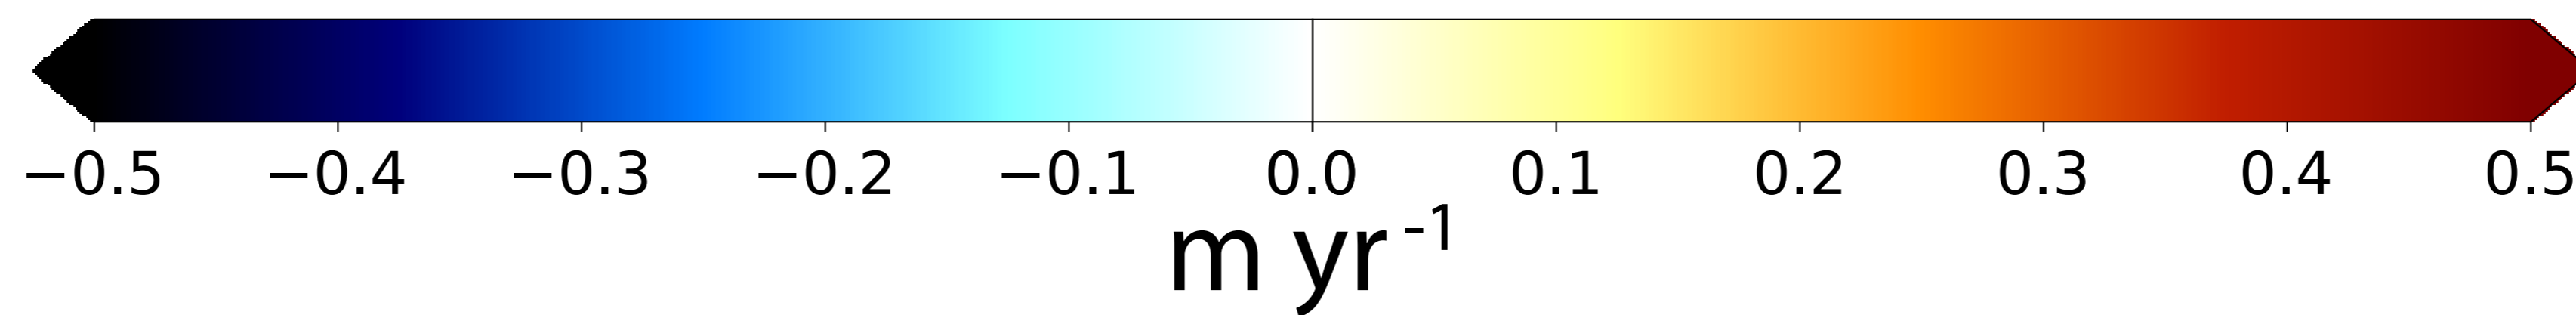

Supplement: Supplementary file 4 [file tc-13-373-2019-supplement.zip]

2W surface wind direction ( $\text{m s}^{-1}$ ) over 2140—2150   $5 \text{ m s}^{-1}$

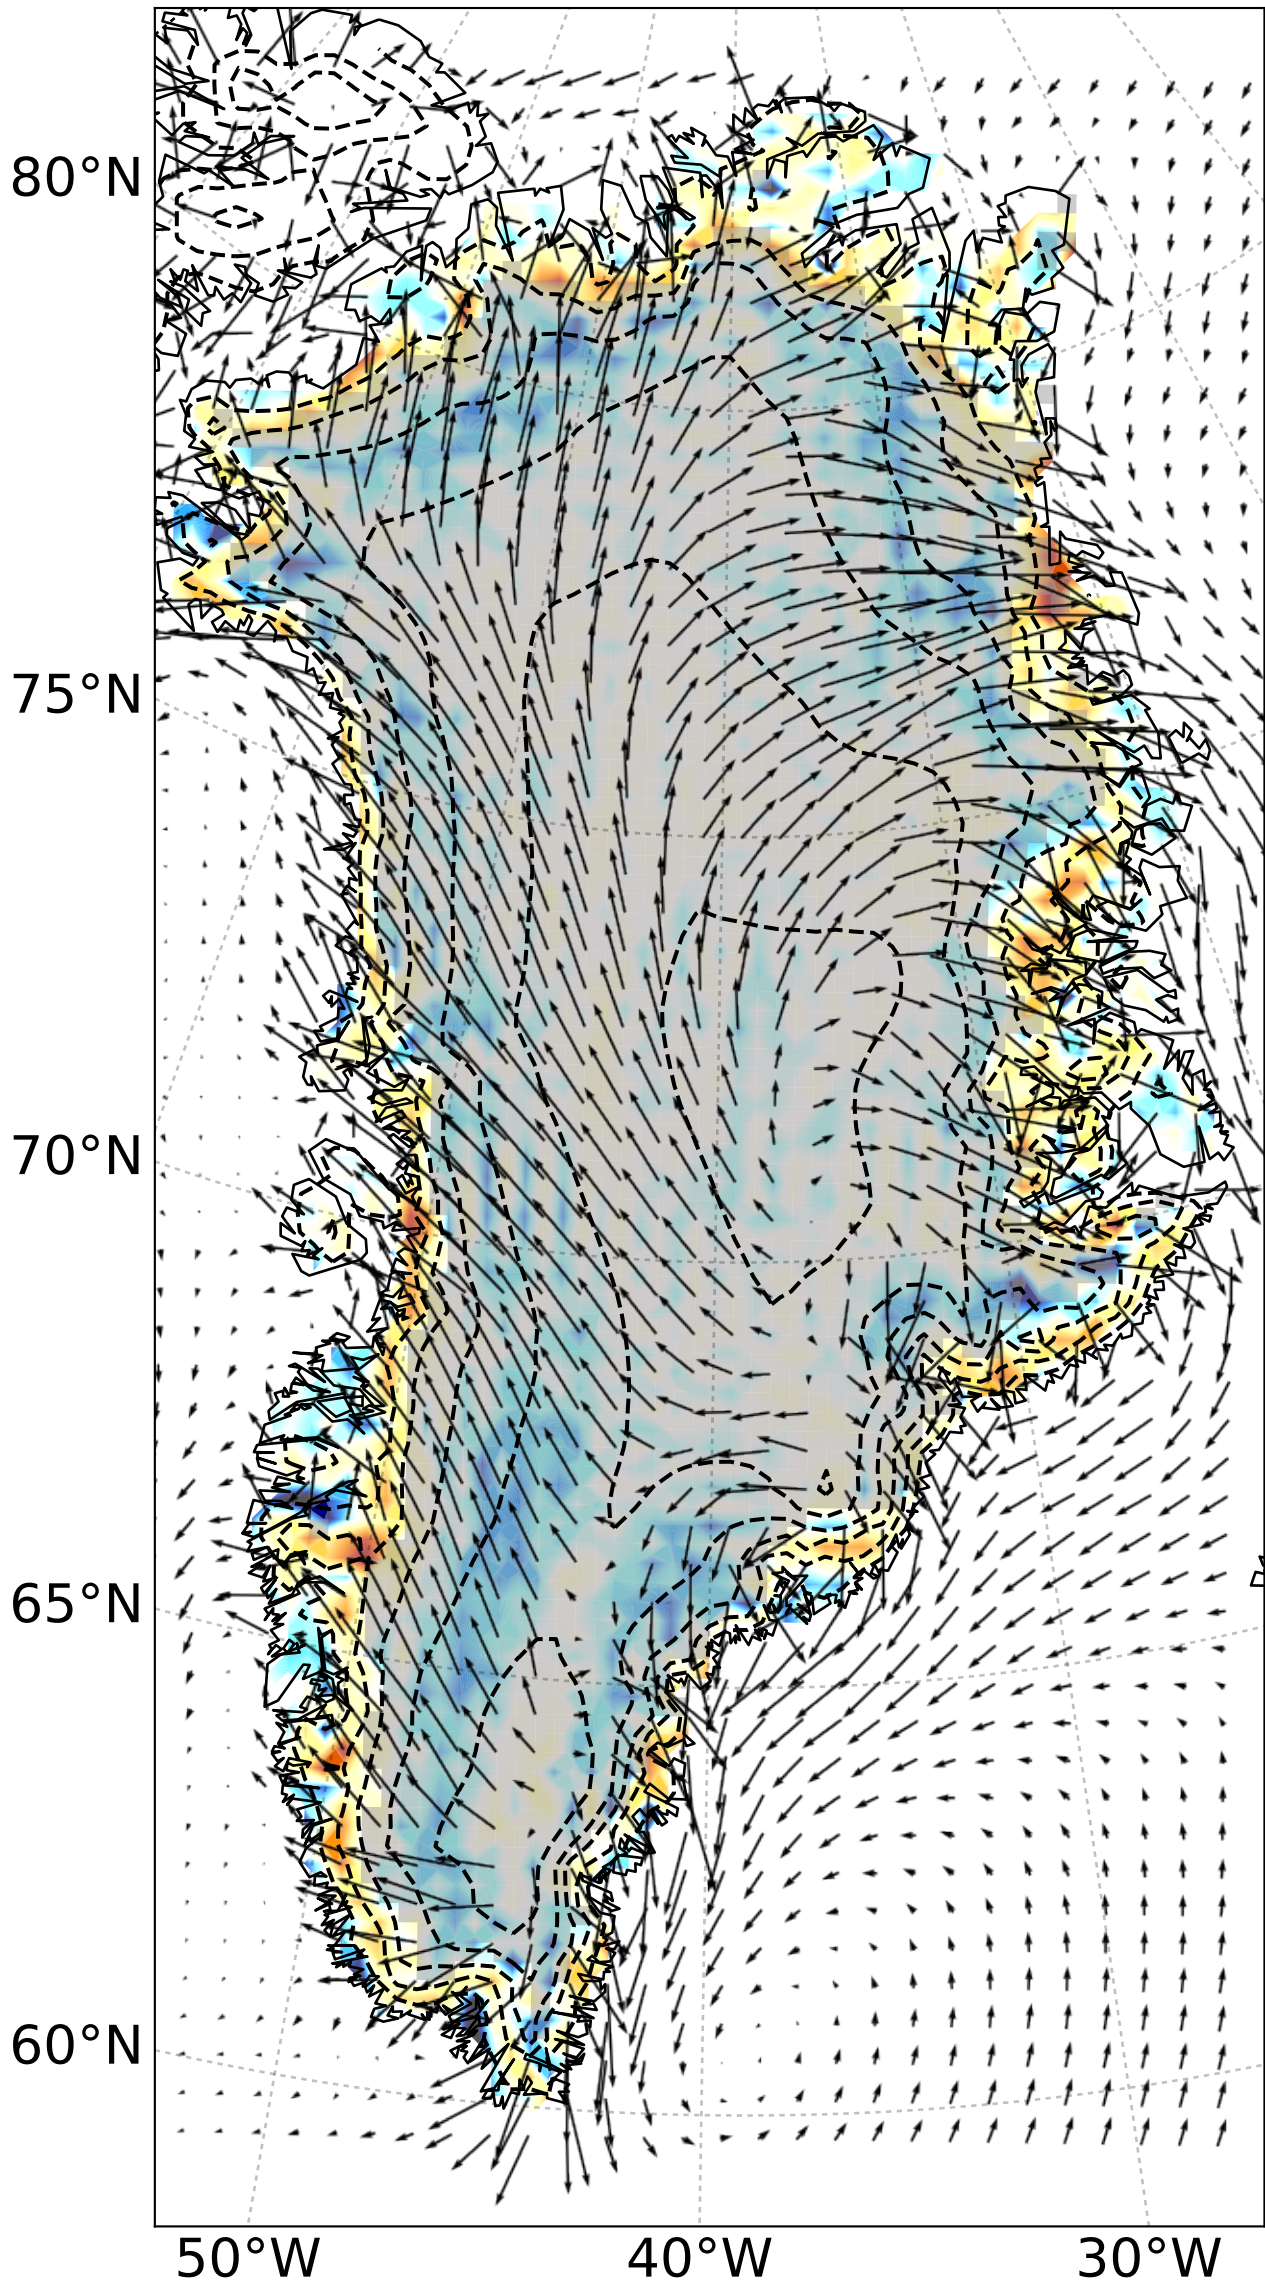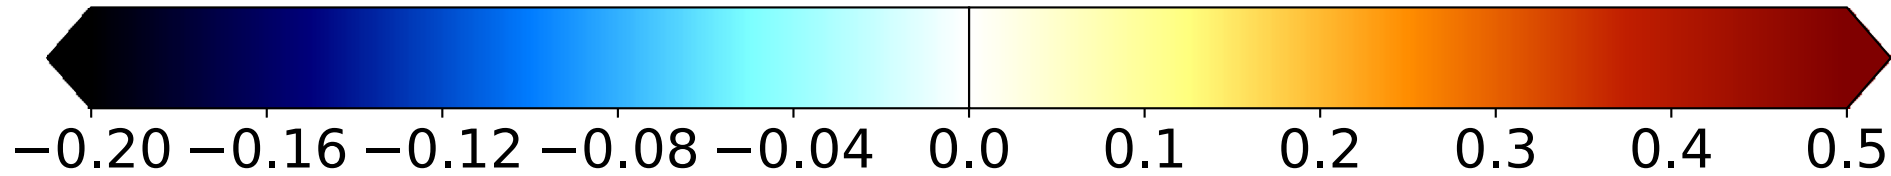

NF - 2W surface wind speed anomaly ( $\text{m s}^{-1}$ ) over 2140—2150

Supplement: Supplementary file 5 [file tc-13-373-2019-supplement.zip]

# 2W Rainfall/Snowfall ratio anomaly (2140—2150) - (2000—2010)

## Annual mean

## DJF mean

## MAM mean

## JJA mean

## SON mean

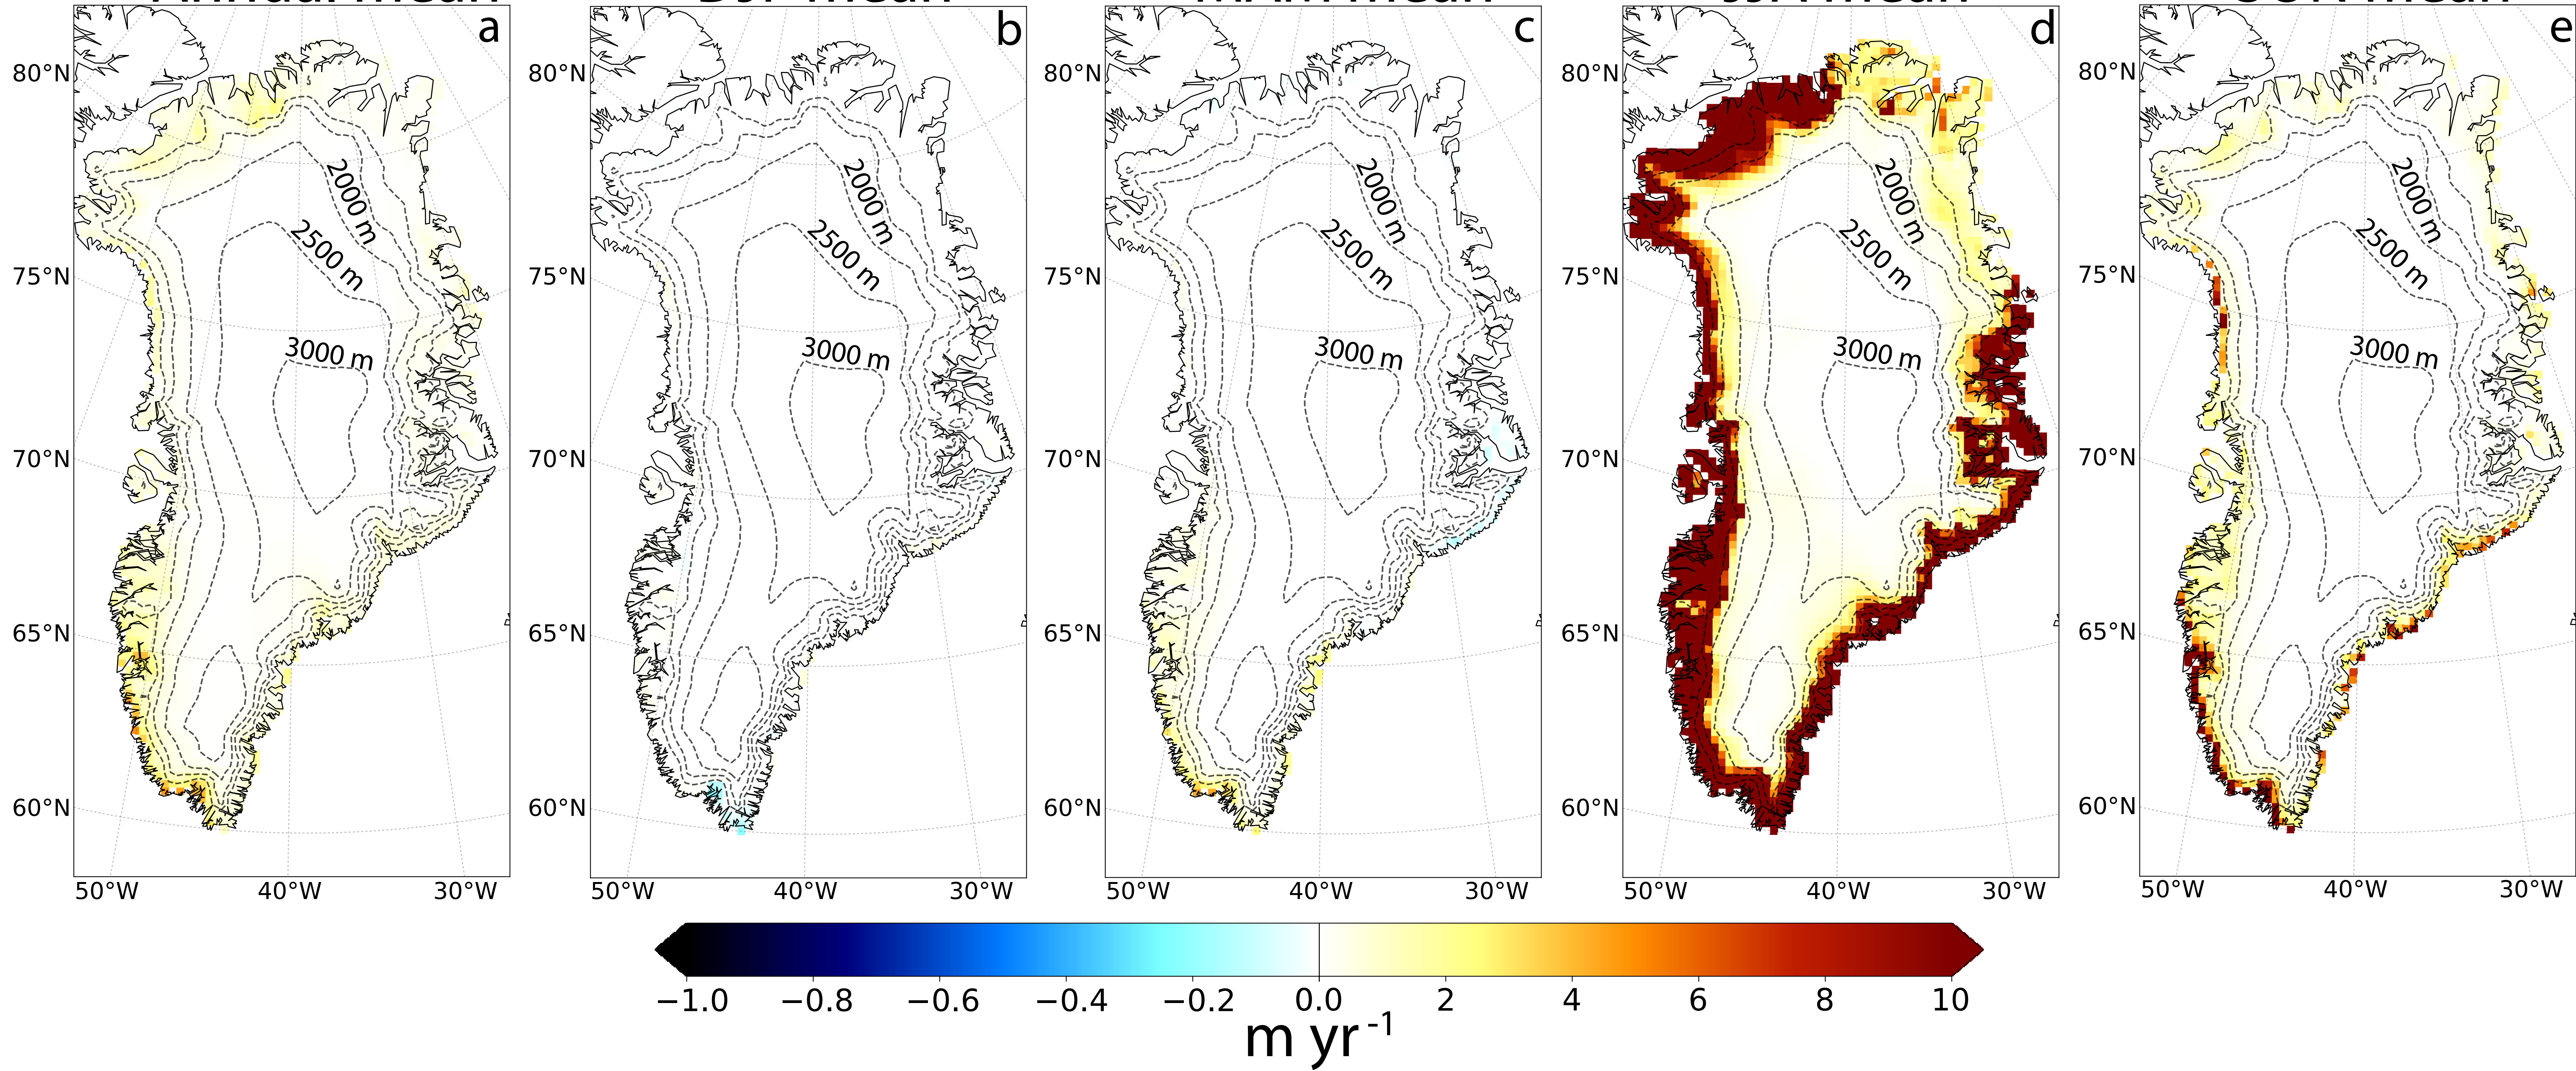

Supplement: Supplementary file 6 [file tc-13-373-2019-supplement.zip]

Observation (Joughin et al., 2018)      GRISLI after initialisation procedure

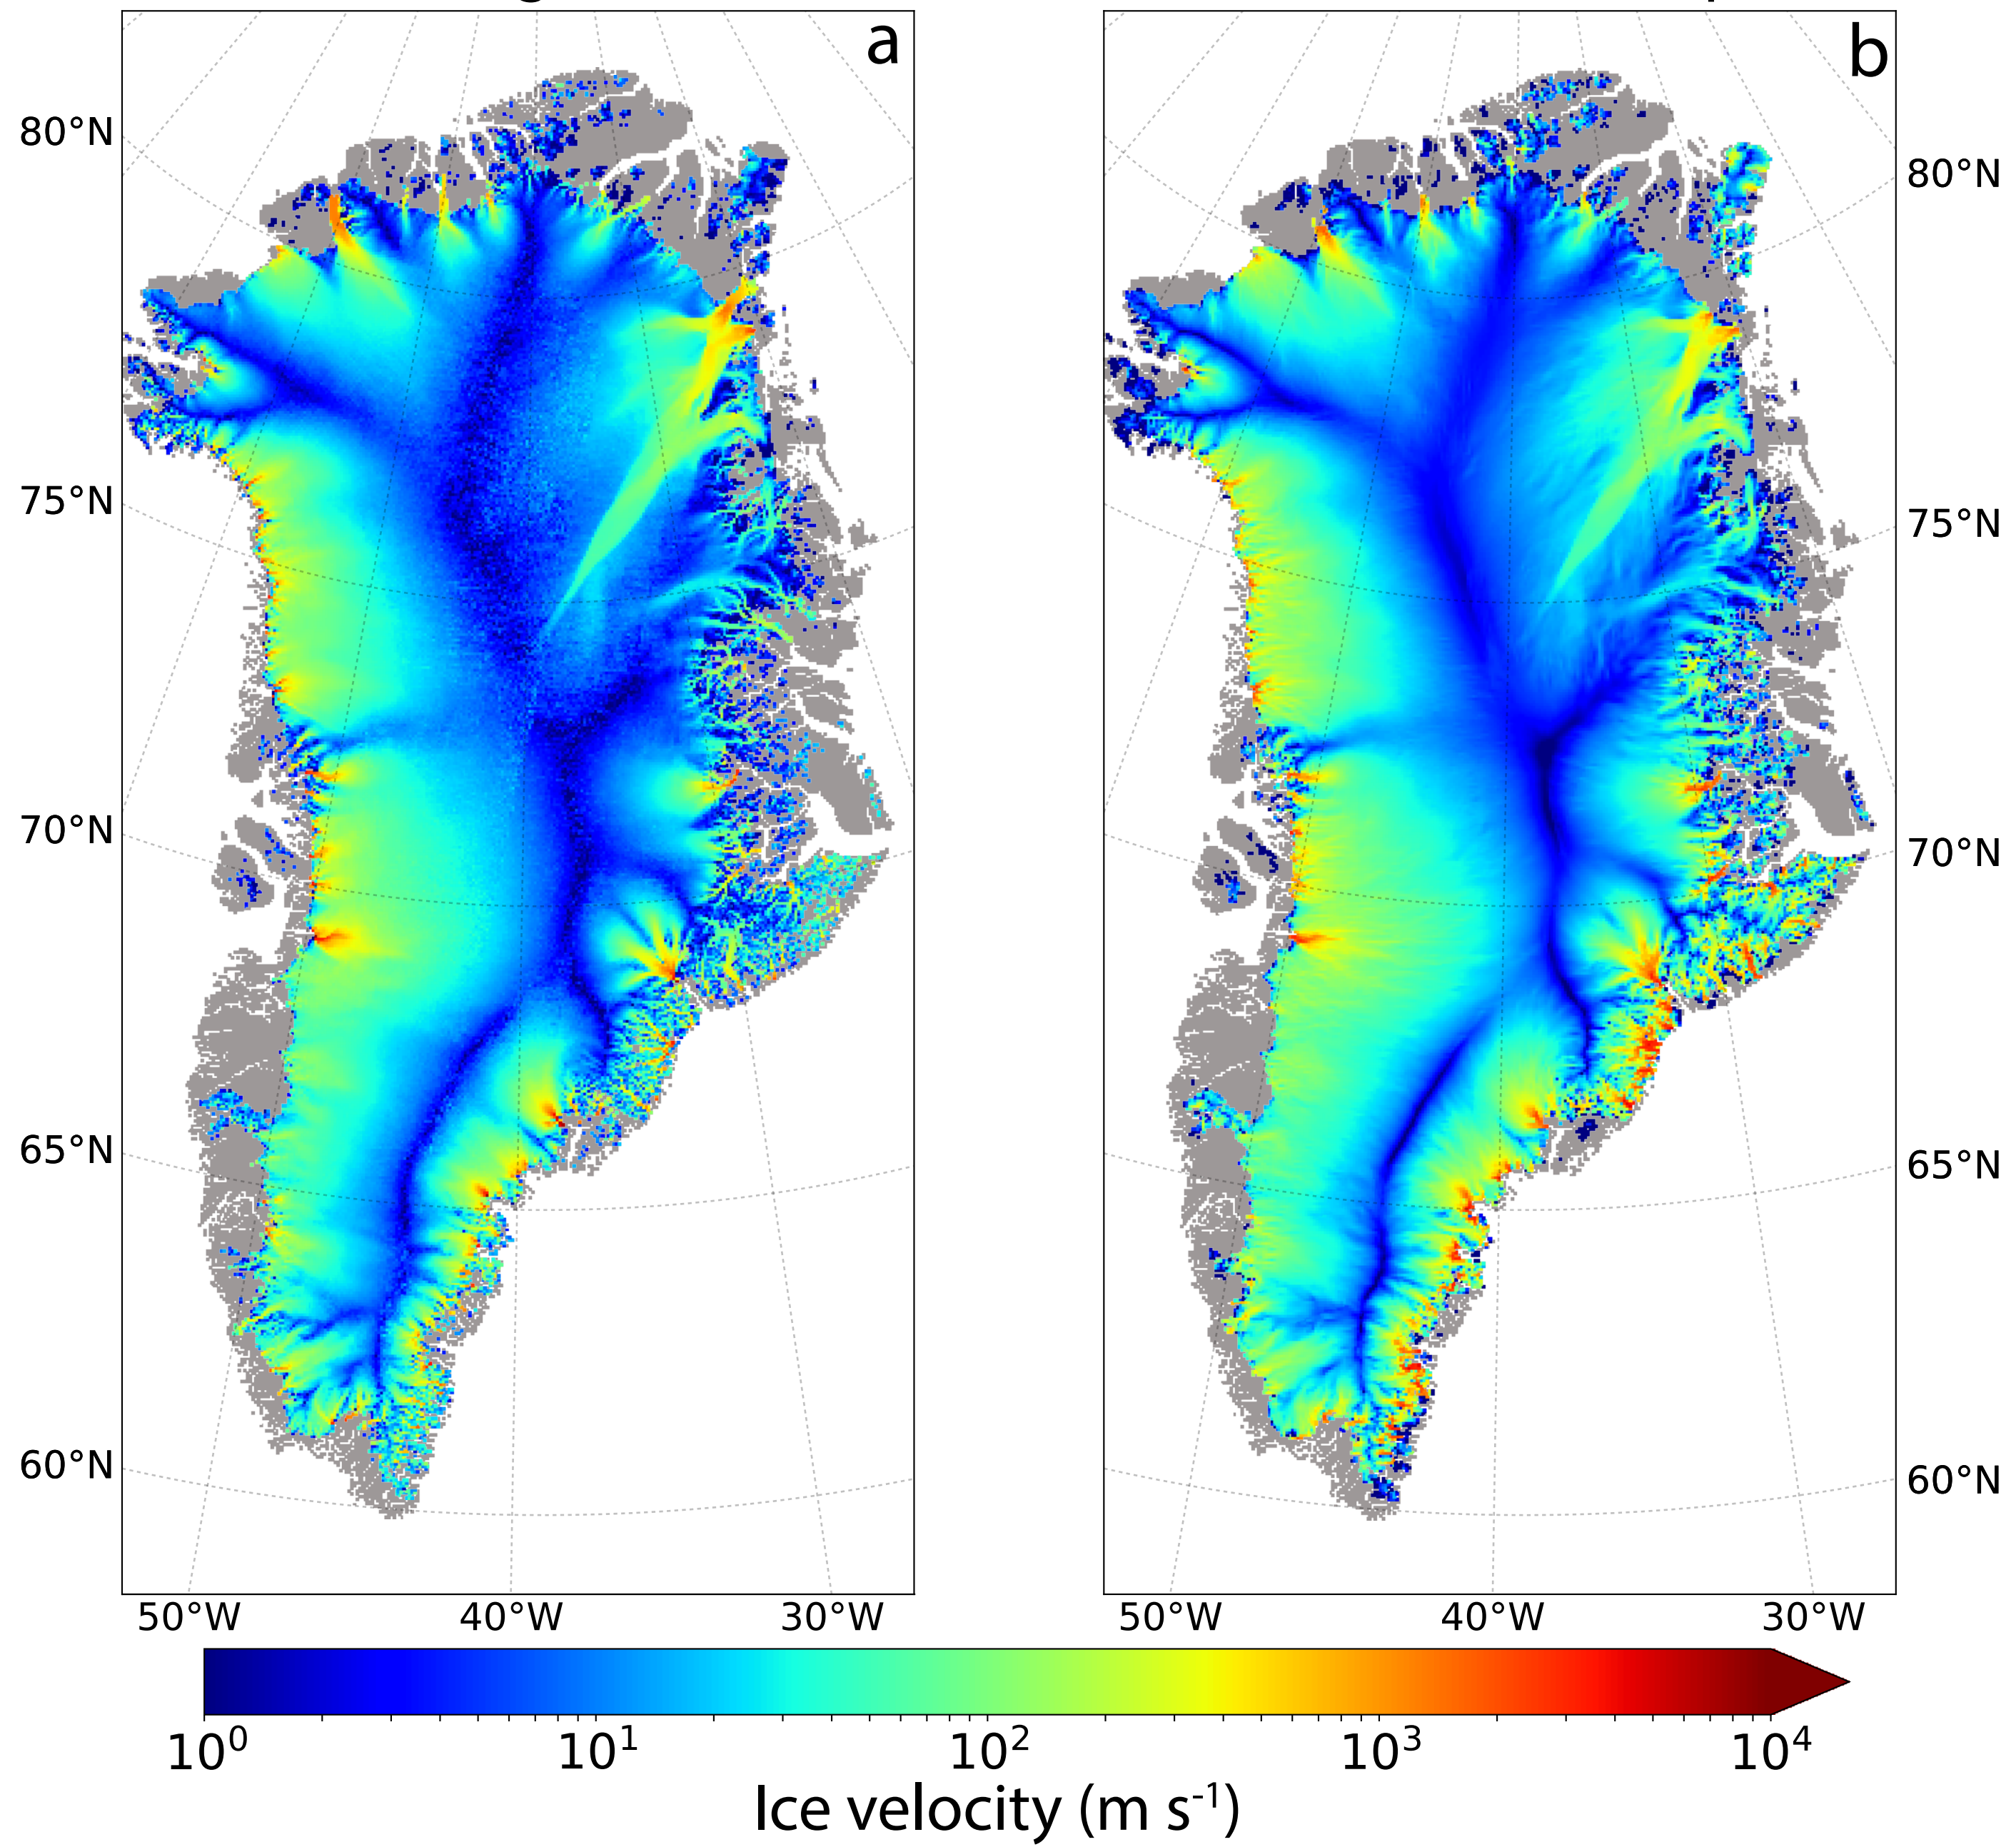

Supplement: Supplementary file 7 [file tc-13-373-2019-supplement.zip]

# NF - 2W Runoff difference 2150—2140

## Annual mean

## DJF mean

## MAM mean

## JJA mean

## SON mean

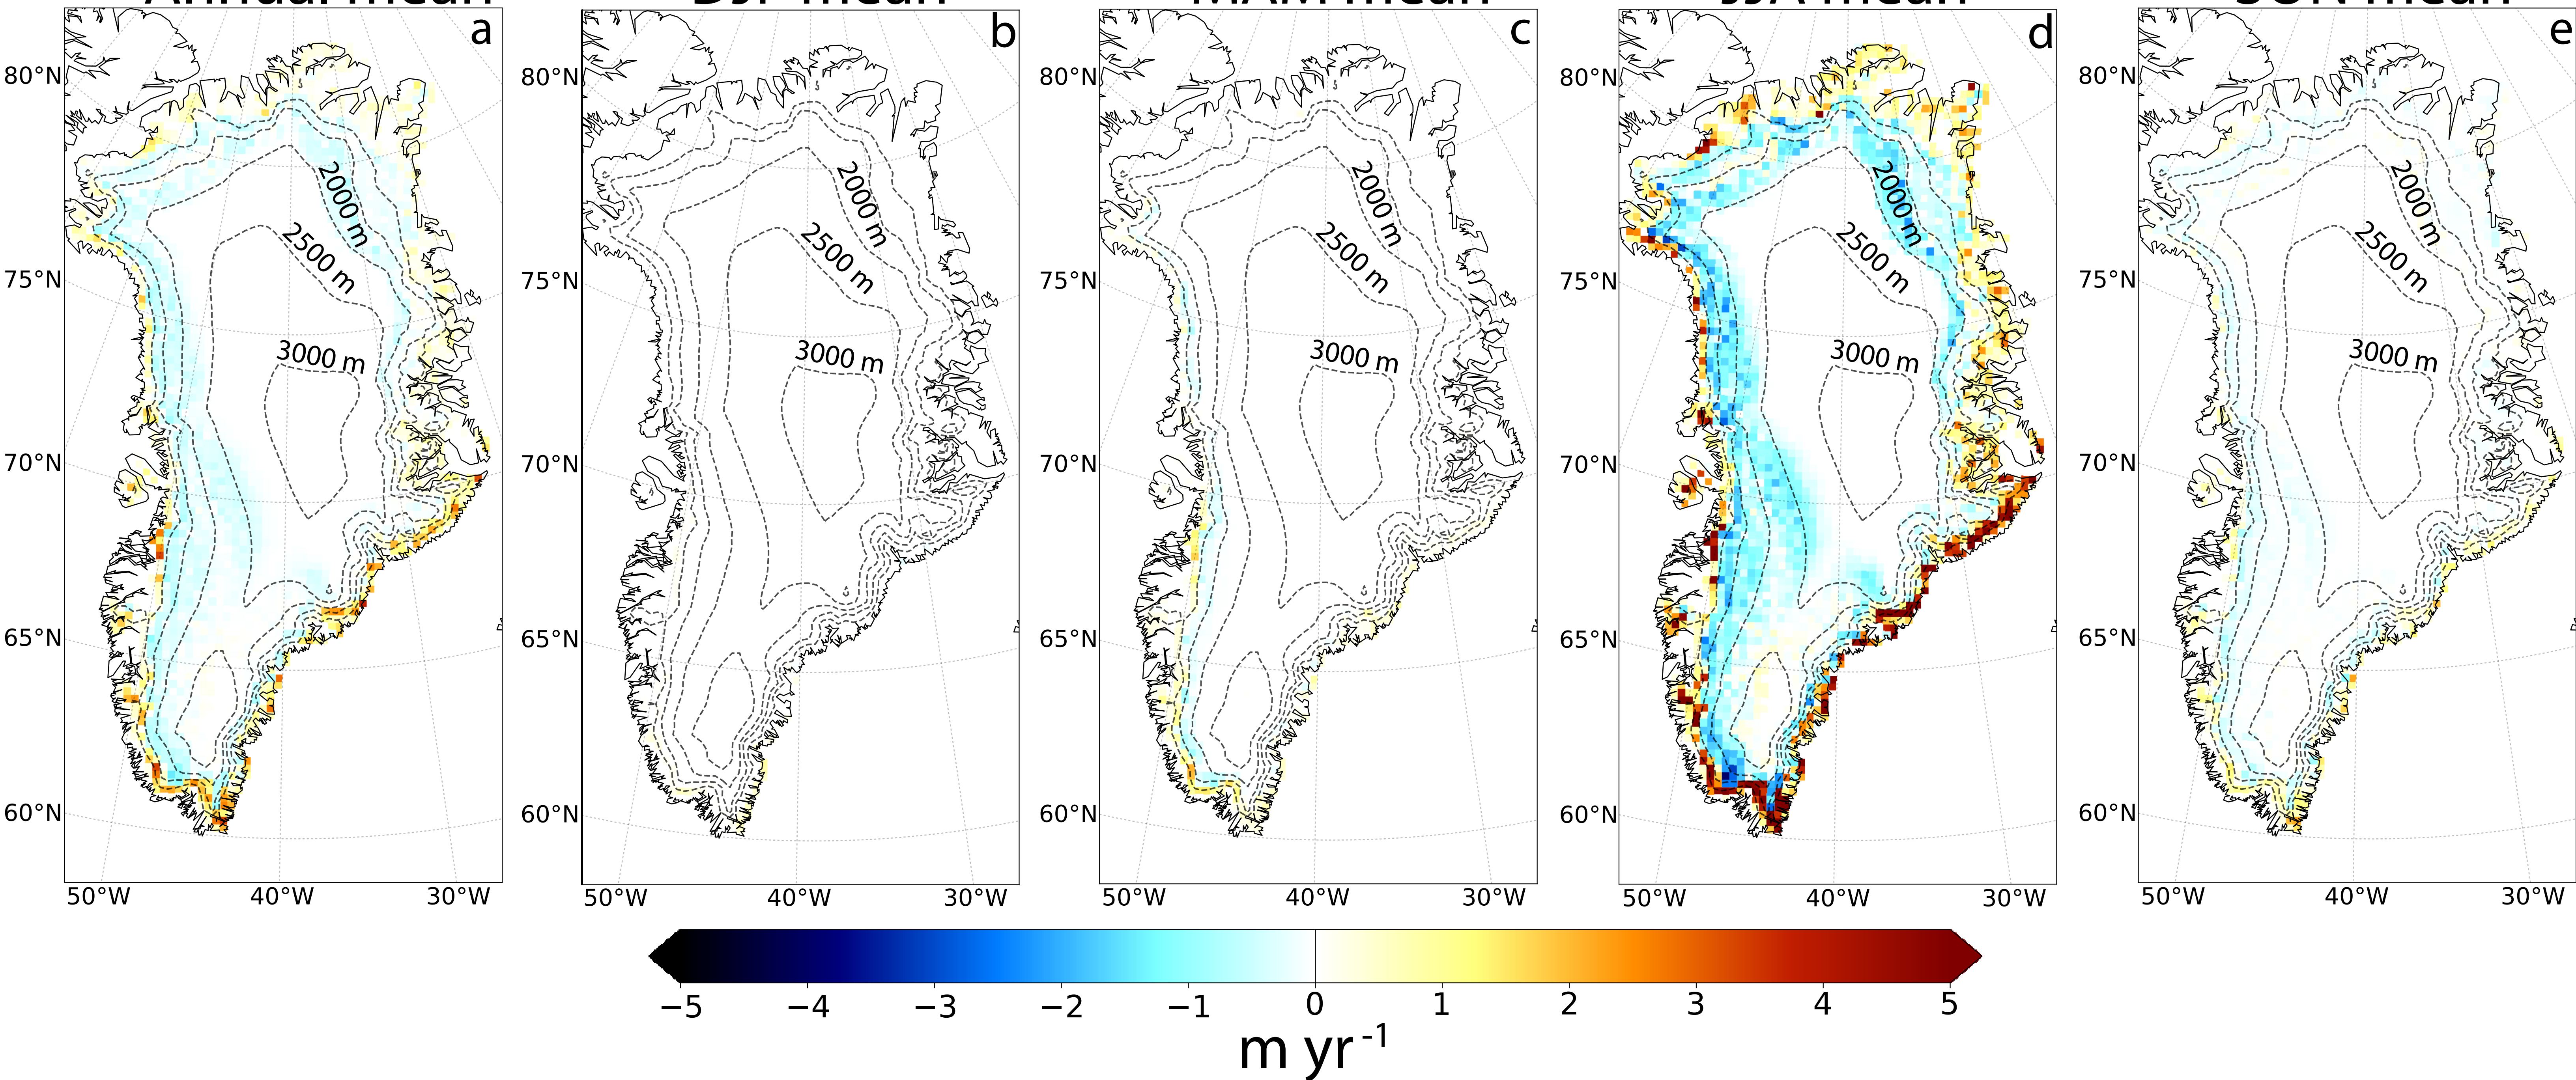

Supplement: Supplementary file 8 [file tc-13-373-2019-supplement.zip]

2W surface wind direction ( $\text{m s}^{-1}$ ) over 2140—2150   $5 \text{ m s}^{-1}$

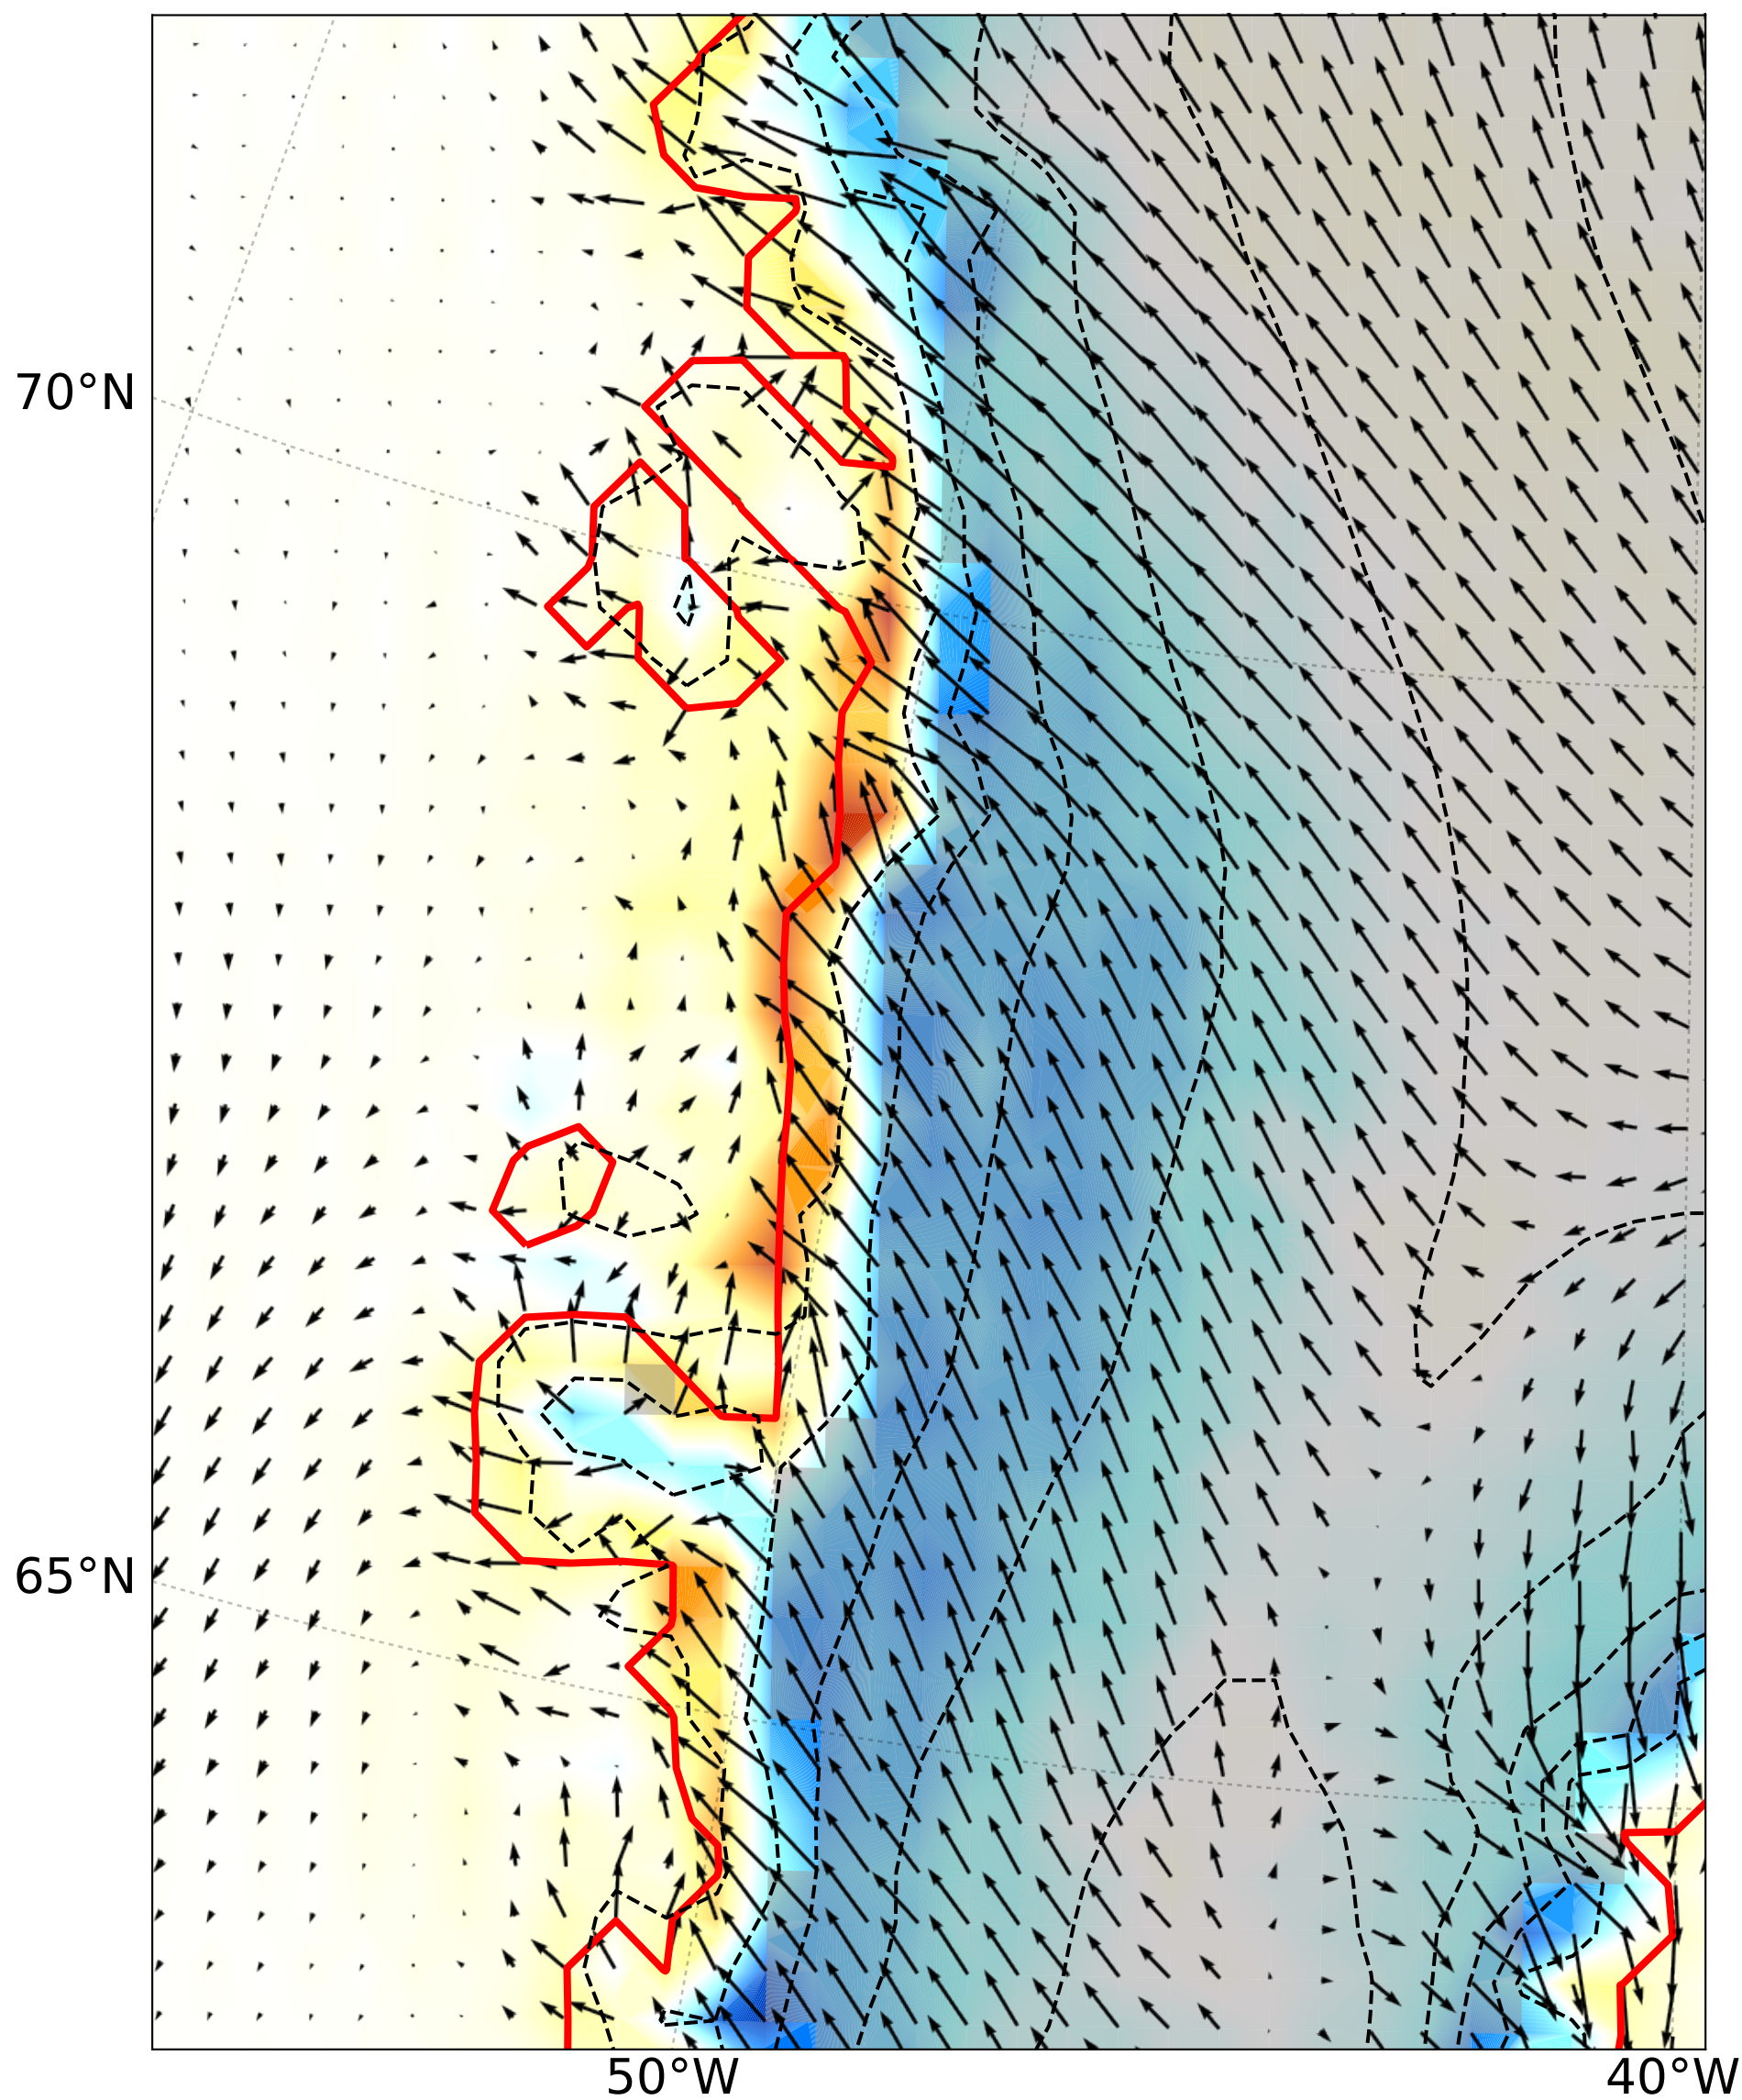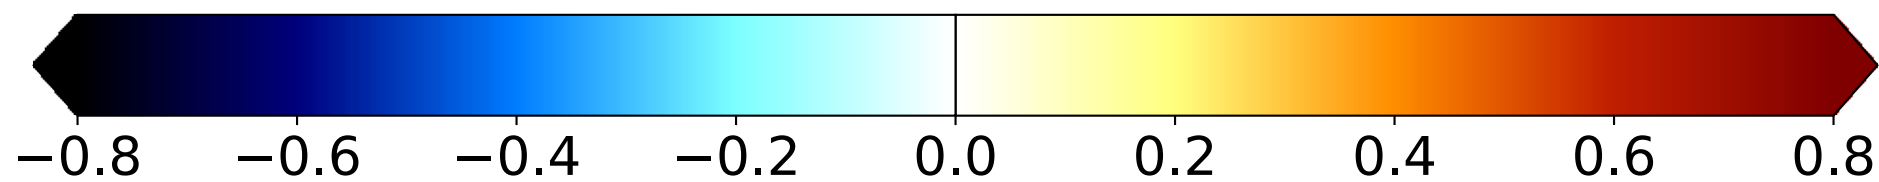

NF - 2W surface temperature anomaly ( $\text{m s}^{-1}$ ) over 2140—2150

Supplement: Supplementary file 10 [file tc-13-373-2019-supplement.zip]

Ice sheet mask (%)

NF experiment

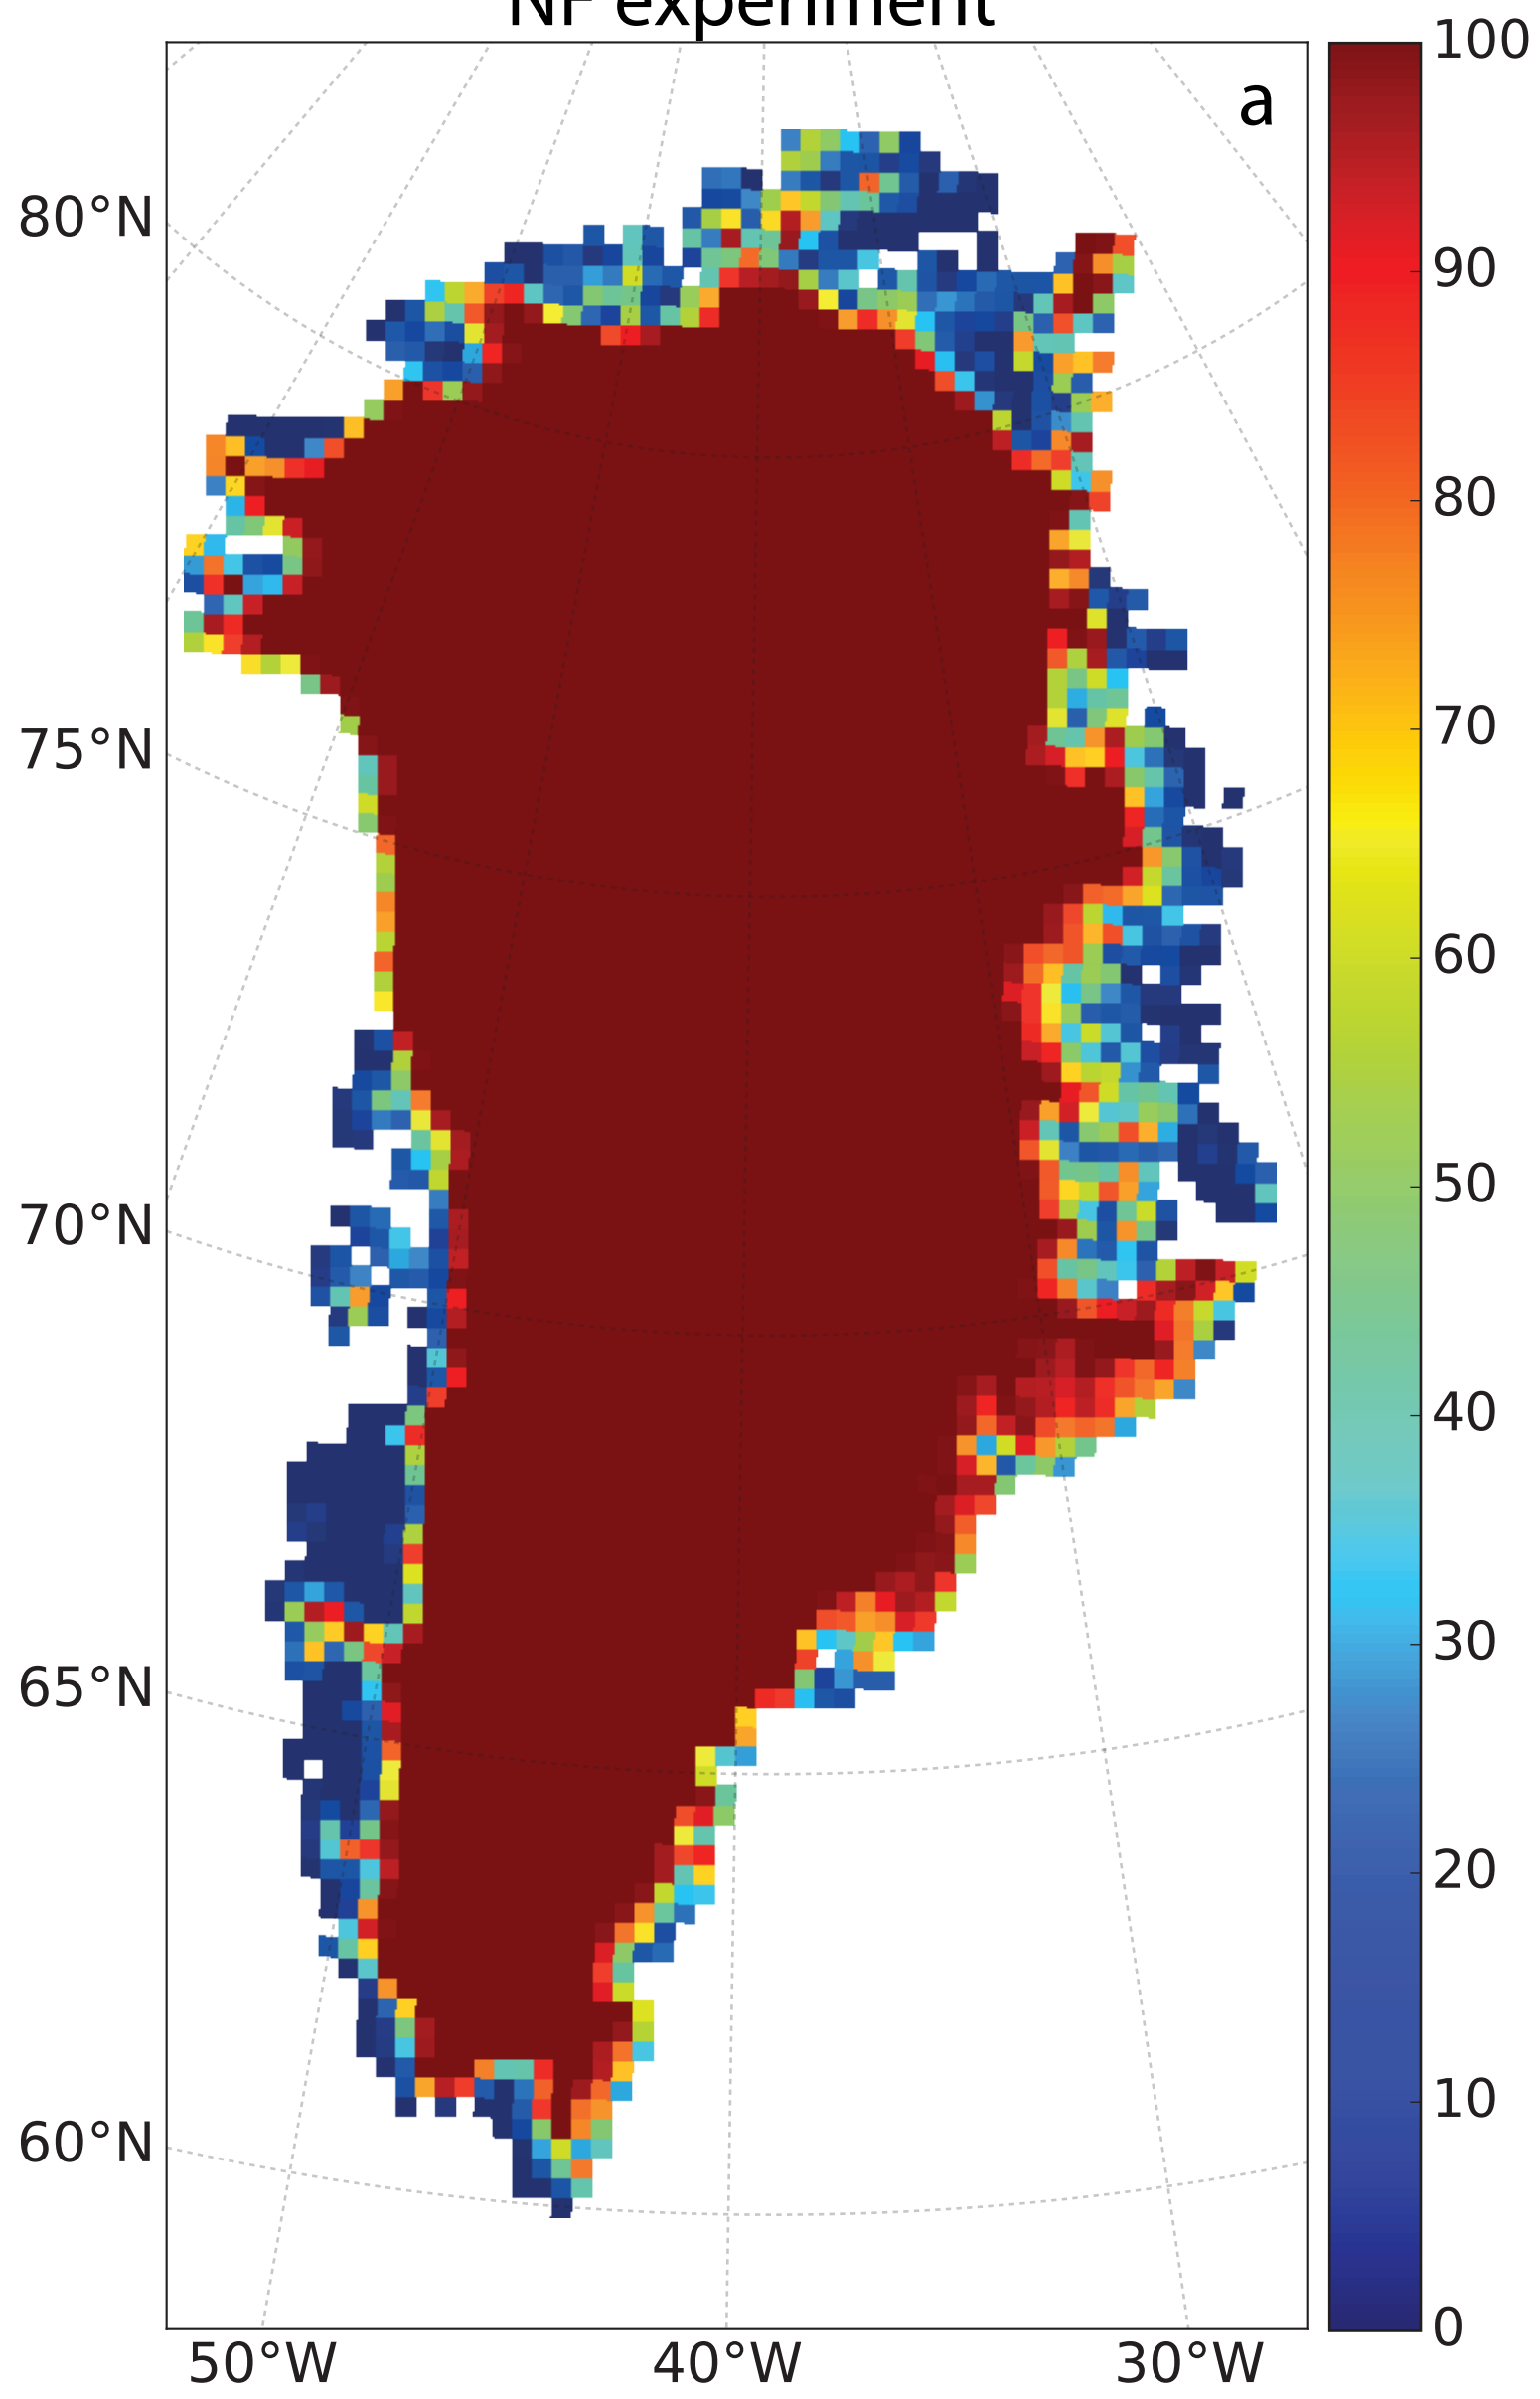

Ice sheet mask difference (%)

NF - 2W (2150)

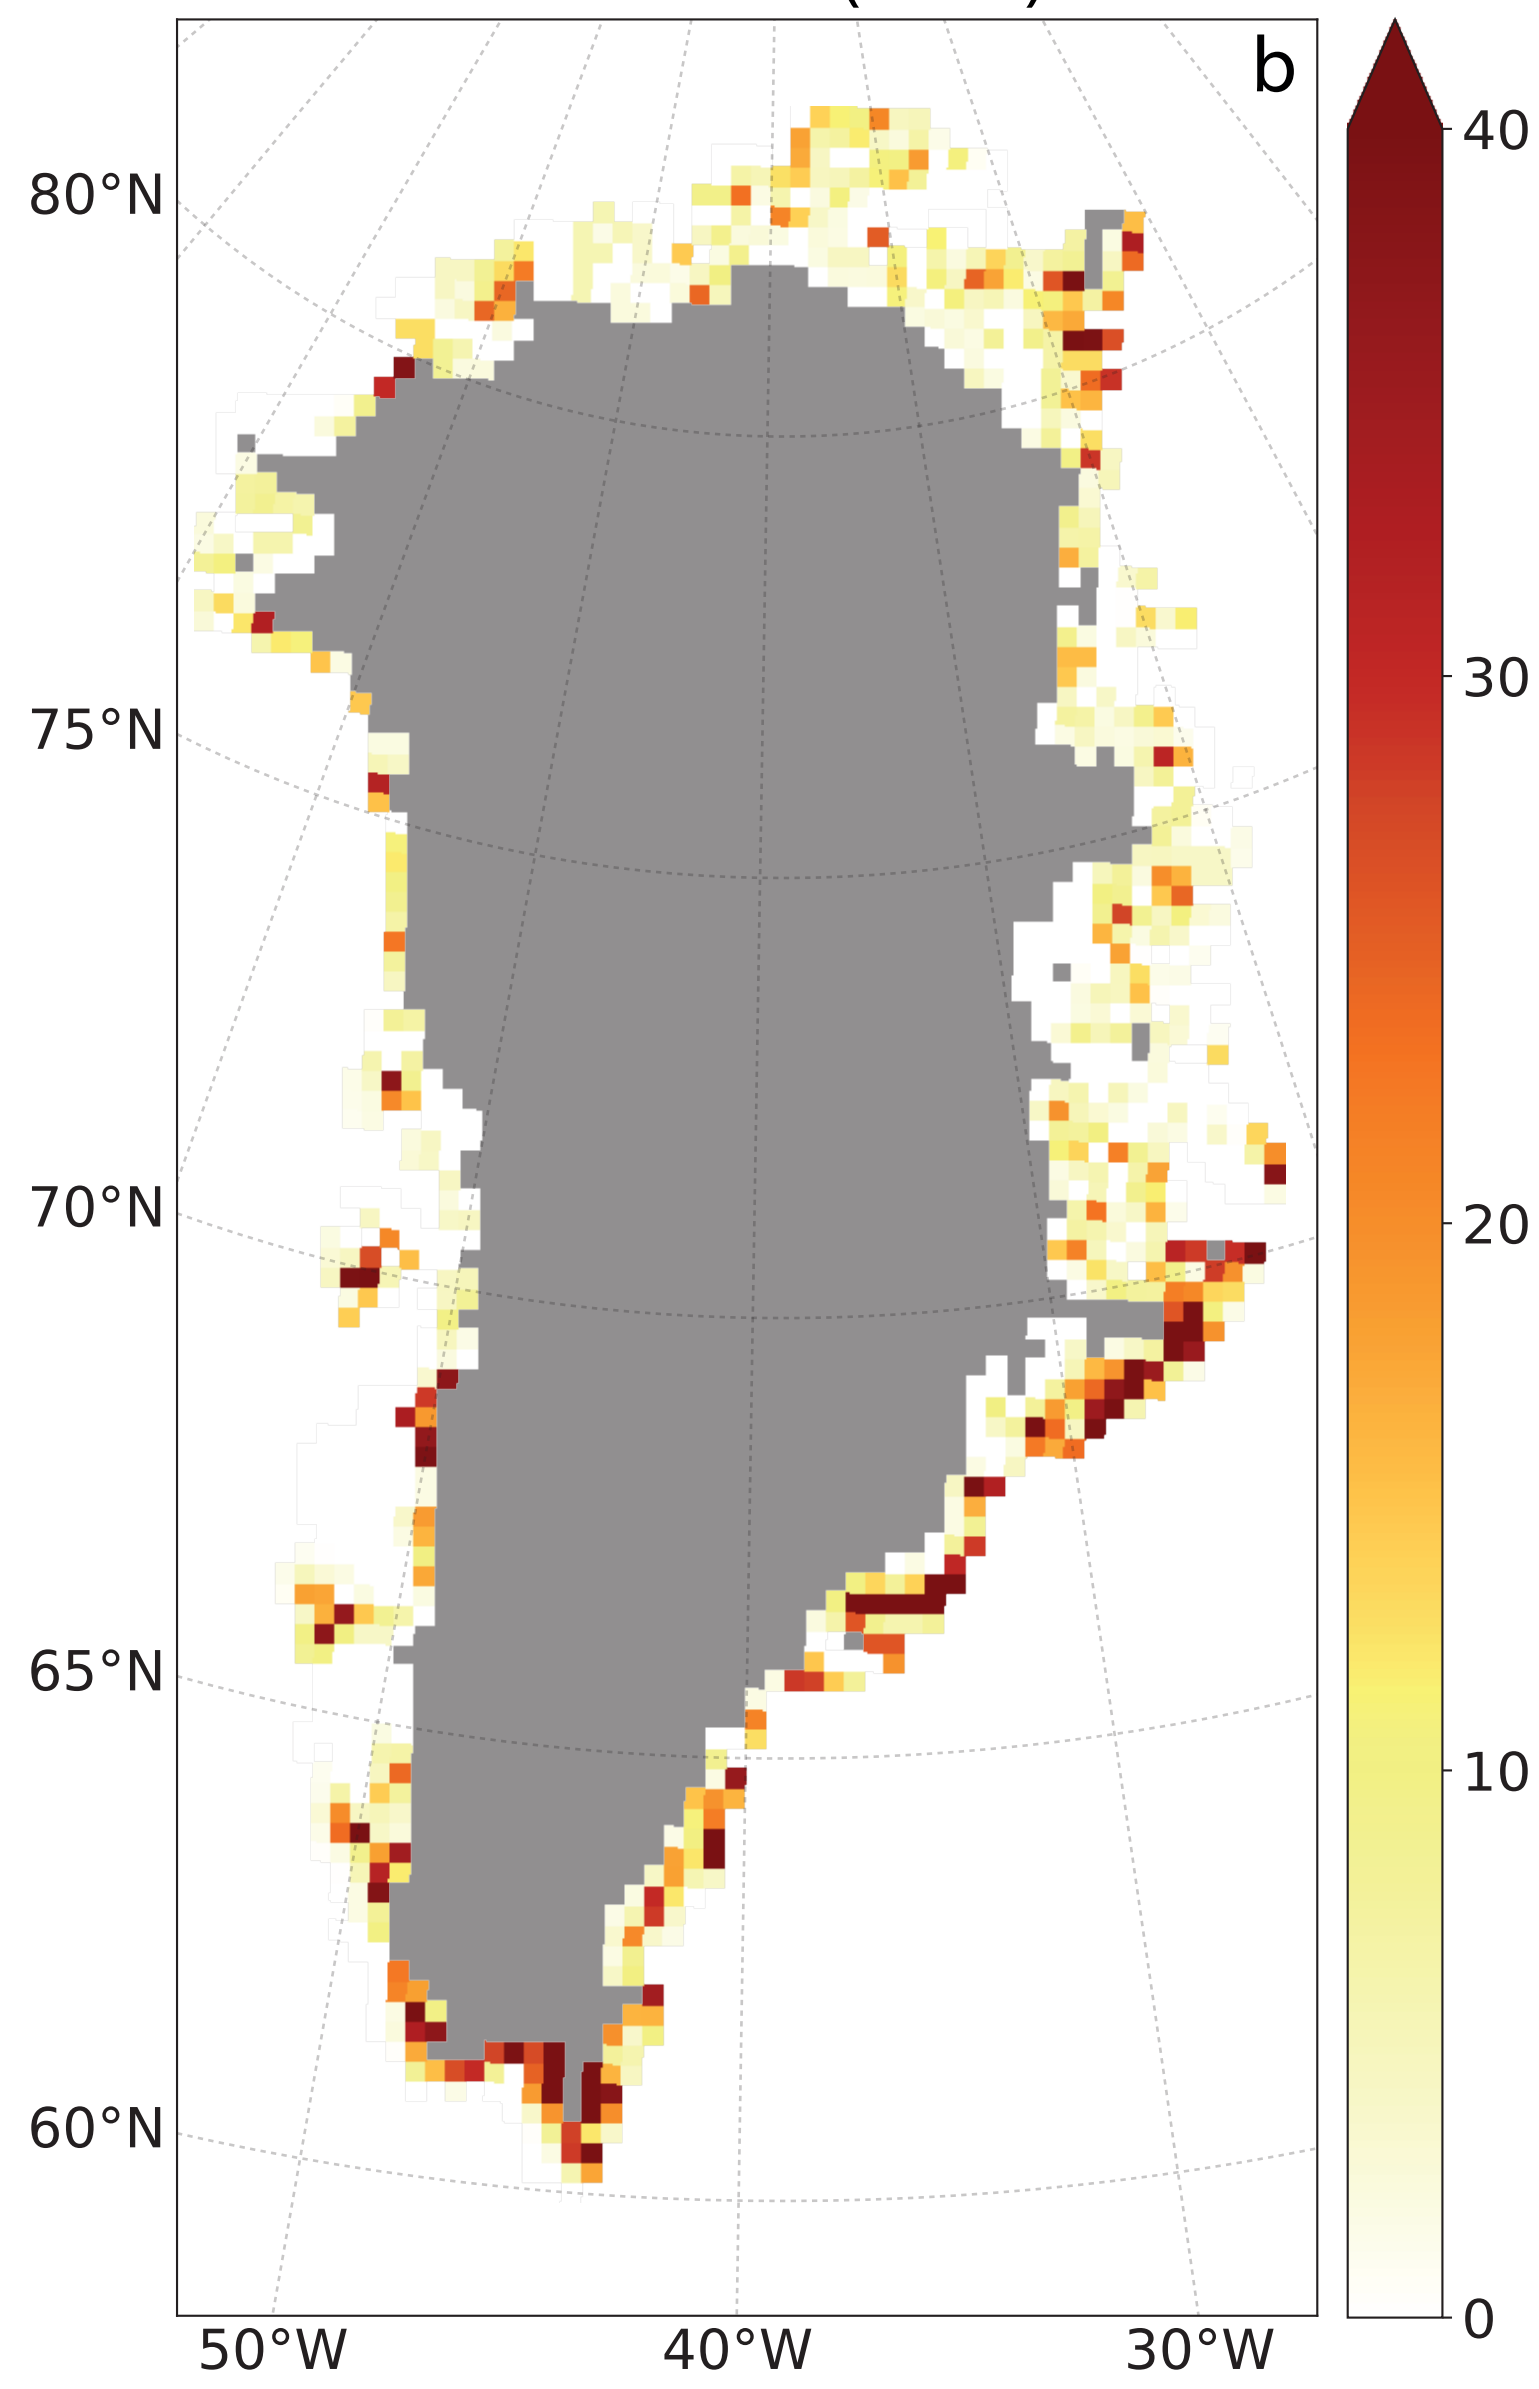

Supplement: Supplementary file 11 [file tc-13-373-2019-supplement.zip]

# Ice thickness difference (m)

## GRISLI vs Observation

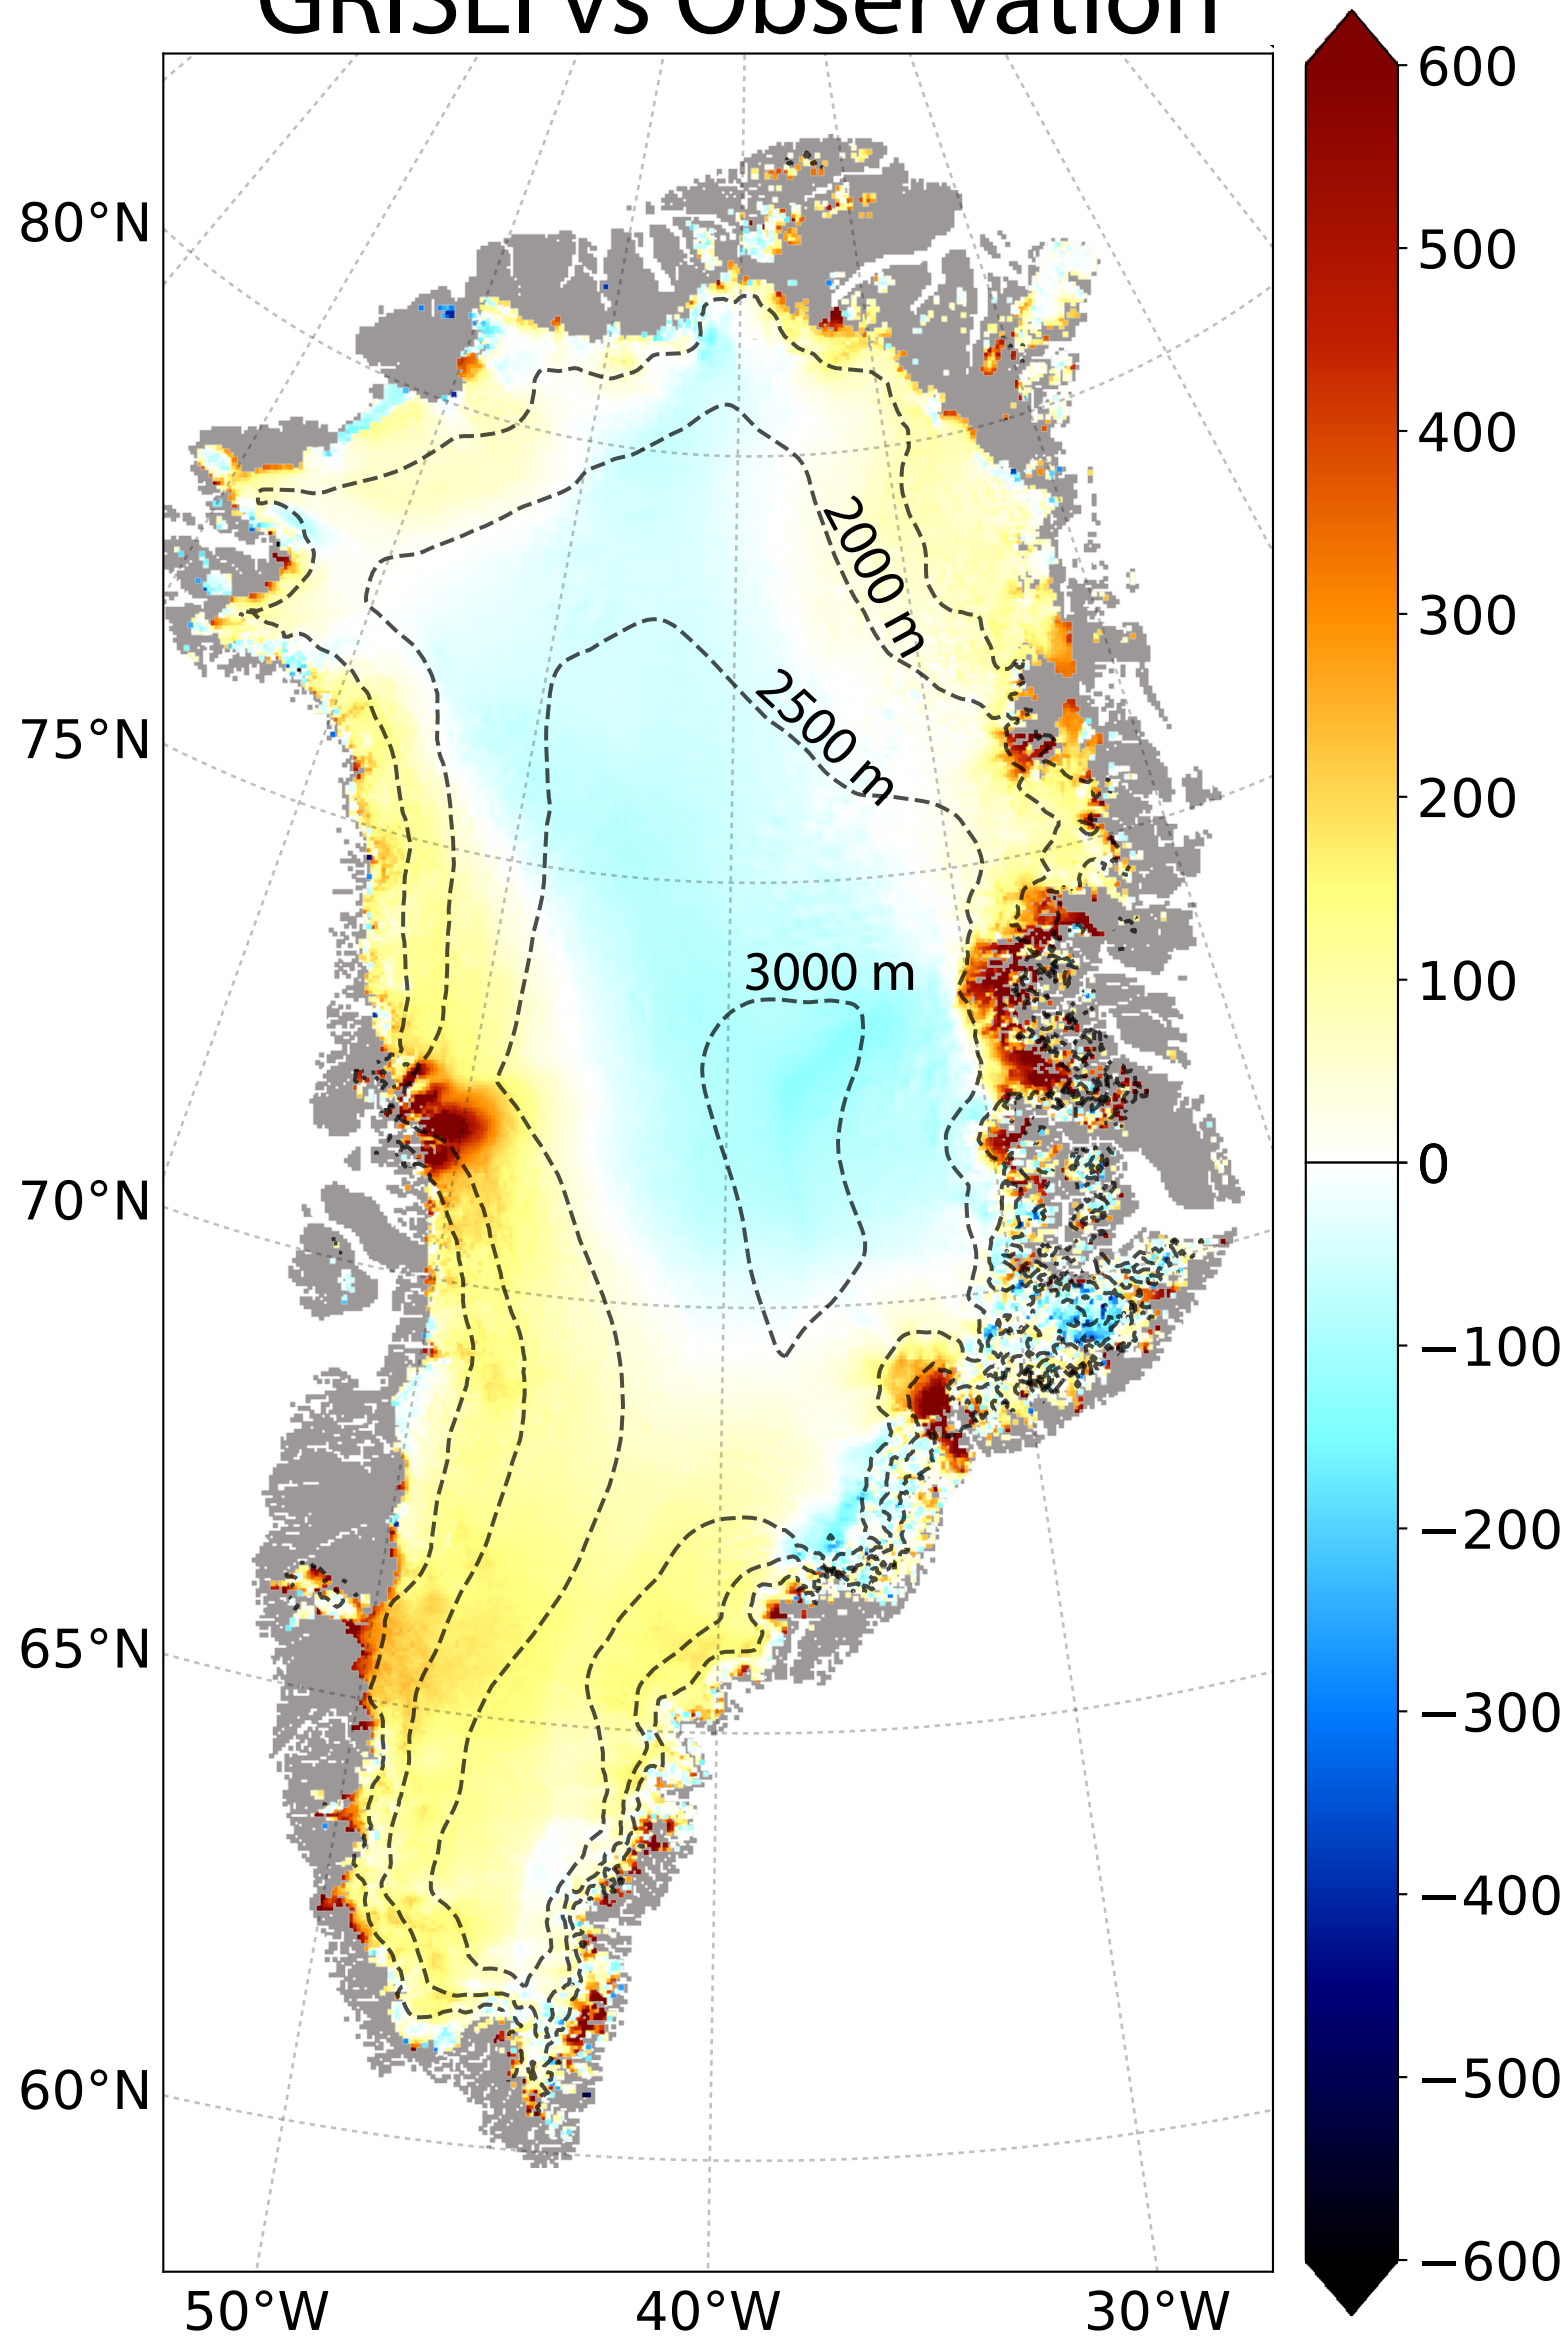

Supplement: Supplementary file 12 [file tc-13-373-2019-supplement.zip]
